# Supplementary material for: Robust coordination of cardiac functions from gene co-expression reveals a versatile combinatorial transcriptional control
Source: Royal Society of Chemistry journal article supplement (doi:10.1039/c4mb00024b), 2014-05-28
Supplement: c4mb00024b1.pdf [file c4mb00024b1.pdf]

**List of references cited in Table 1 but not in the main text: transcriptional regulators involved in the coupled coordination of energy production and cardiac contraction**

- Arsanjani R, McCarren M, Bahl JJ, Goldman S (2011) Translational potential of thyroid hormone and its analogs. *J Mol Cell Cardiol* 51:506-511.
- Bragança J, Eloranta JJ, Bamforth SD, Ibbitt JC, Hurst HC, Bhattacharya S (2003) Physical and Functional Interactions among AP-2 Transcription Factors, p300/CREB-binding Protein, and CITED2. *J Biol Chem* 278:16021-16029.
- Diman NY, Remacle S, Bertrand N, Picard JJ, Zaffran S, Rezsöházy R (2011) A retinoic acid responsive *Hoxa3* transgene expressed in embryonic pharyngeal endoderm, cardiac neural crest and a subdomain of the second heart field. *PLoS ONE* 6 e27624.
- Elnakish MT, Awad MM, Hassona MDH, Alhaj MA, Kulkarni A, Citro LA, Sayyid M, Abouelnaga ZA, El-Sayed O, Kuppusamy P, Moldovan L, Khan M, Hassanain HH (2011) Cardiac remodeling caused by transgenic overexpression of a corn *Rac* gene. *Am J Physiol Heart Circ Physiol* 301:H868-H880.
- Fu Y, Chang AC, Fournier M, Chang L, Niessen K, Karsan A (2011) *RUNX3* maintains the mesenchymal phenotype after termination of the Notch signal. *J Biol Chem* 286:11803-11813.
- Hao H, Kim DS, Klocke B, Johnson KR, Cui K, Gotoh N, Zang C, Gregorski J, Gieser L, Peng W, Fann Y, Seifert M, Zhao K, Swaroop A (2012) Transcriptional Regulation of Rod Photoreceptor Homeostasis Revealed by *In Vivo* NRL Targetome Analysis. *PLoS Genet* 8:e1002649.
- Hastings ML, Allemand E, Duelli DM, Myers MP, Krainer AR (2007) Control of pre-mRNA splicing by the general splicing factors PUF60 and U2AF(65). *PLoS ONE* 2:e538.
- Hwang J, Saffert RT, Kalejta RF (2011) Elongin B-Mediated Epigenetic Alteration of Viral Chromatin Correlates with Efficient Human Cytomegalovirus Gene Expression and Replication. *mBio* 2: e00023.
- Jiang W, Wang J, Zhang Y (2013) Histone H3K27me3 demethylases KDM6A and KDM6B modulate definitive endoderm differentiation from human ESCs by regulating WNT signaling pathway. *Cell Res* 23:122-130.
- Koch A, Steffen J, Krüger E (2011) TCF11 at the crossroads of oxidative stress and the ubiquitin proteasome system. *Cell Cycle* 10:1200-1207.
- Kollara A, Brown T (2012) Expression and function of nuclear receptor co-activator 4: evidence of a potential role independent of co-activator activity. *Cell Mol Life Sci* 69:3895-3909.
- Kolodziejaska KM, Noyan-Ashraf MH, Nagy A, Bacon A, Frampton J, Xin HB, Kotlikoff MI, Husain M (2008) c-Myb-Dependent Smooth Muscle Cell Differentiation. *Circ Res* 102:554-56.
- Lee YH, Stallcup MR (2006) Interplay of Fli-1 and FLAP1 for regulation of  $\beta$ -catenin dependent transcription. *Nucl Acids Res* 34:5052-5059.
- Leemann-Zakaryan RP, Pahlich S, Sedda MJ, Quero L, Grossenbacher D, Gehring H (2009) Dynamic subcellular localization of the Ewing sarcoma proto-oncoprotein and its association with and stabilization of microtubules. *J Mol Biol* 386:1-13.
- Manuel A, Beaupain D, Romeo PH, Raich N (2000) Molecular Characterization of a Novel Gene Family (PHTF) Conserved from *Drosophila* To Mammals. *Genomics* 64:216-220.
- Mao CD, Byers SW (2011) Cell-context dependent TCF/LEF expression and function: alternative tales of repression, de-repression and activation potentials. *Crit Rev Eukaryot Gene Expr* 21:207-236.
- Matsuyama R, Takada I, Yokoyama A, Fujiyama-Nakamura S, Tsuji N, Kitagawa H, Fujiki R, Kim M, Kouzu-Fujita M, Yano T, Kato S (2010) Double PHD Fingers Protein DPF2 Recognizes Acetylated Histones and

Suppresses the Function of Estrogen-related Receptor  $\alpha$  through Histone Deacetylase 1. *J Biol Chem* 285:18166-18176.

Mir SA, Chatterjee A, Mitra A, Pathak K, Mahata SK, Sarkar S (2012) Inhibition of Signal Transducer and Activator of Transcription 3 (STAT3) Attenuates Interleukin-6 (IL-6)-induced Collagen Synthesis and Resultant Hypertrophy in Rat Heart. *J Biol Chem* 287:2666-2677.

Mukundan B, Ansari A (2011) Novel Role for Mediator Complex Subunit Srb5/Med18 in Termination of Transcription. *J Biol Chem* 286:37053-37057.

Muller-Borer B, Esch G, Aldina R, Woon W, Fox R, Bursac N, Hiller S, Maeda N, Shepherd N, Jin JP, Hutson M, Anderson P, Kirby ML, Malouf NN (2012) Calcium Dependent CAMTA1 in Adult Stem Cell Commitment to a Myocardial Lineage. *PLoS ONE* 7:e38454.

Murai-Takeda A, Shibata H, Kurihara I, Kobayashi S, Yokota K, Suda N, Mitsuishi Y, Jo R, Kitagawa H, Kato S, Saruta T, Itoh H (2010) NF- $\kappa$ B Functions as a Corepressor of Agonist-bound Mineralocorticoid Receptor. *J Biol Chem* 285:8084-8093.

Pan W, Jia Y, Huang T, Wang J, Tao D, Gan X, Li L (2006) Beta-catenin relieves I-mfa-mediated suppression of LEF-1 in mammalian cells. *J Cell Sci* 119:4850-4856.

Rao TP, Kuhl M (2010) An updated overview on Wnt signaling pathways: a prelude for more. *Circ Res* 106:1798-1806.

Sdek P, Zhao P, Wang Y, Huang CJ, Ko CY, Butler PC, Weiss JN, MacLellan WR (2011) Rb and p130 control cell cycle gene silencing to maintain the postmitotic phenotype in cardiac myocytes *J Cell Biol* 194:407-423

Su ZZ, Lee SG, Emdad L, Lebdeva IV, Gupta P, Valerie K, Sarkar D, Fisher PB (2008) Cloning and characterization of SARI (suppressor of AP-1, regulated by IFN). *Proc Natl Acad Sci USA* 105:20906-20911.

Teo AK, Arnold SJ, Trotter MW, Brown S, Ang LT, Chng Z, Robertson EJ, Dunn NR, Vallier L (2011) Pluripotency factors regulate definitive endoderm specification through eomesodermin. *Genes Dev* 25:238-250.

Trivedi CM, Cappola TP, Margulies KB, Epstein JA (2011) Homeodomain Only Protein X is down-regulated in human heart failure. *J Mol Cell Cardiol* 50:1056-1058.

Vernochet C, Peres SB, Davis KE, McDonald ME, Qiang L, Wang H, Scherer PE, Farmer SR (2009) C/EBP $\alpha$  and the Corepressors CtBP1 and CtBP2 Regulate Repression of Select Visceral White Adipose Genes during Induction of the Brown Phenotype in White Adipocytes by Peroxisome Proliferator-Activated Receptor  $\gamma$  Agonists. *Mol Cell Biol* 29:4714-4728.

Wang L, Tsai CC (2008) Atrophin proteins: an overview of a new class of nuclear receptor corepressors. *Nucl Recept Signal* 6:e009.

Xie T, Graveline R, Kumar GS, Zhang Y, Krishnan A, David G, Radhakrishnan I (2012) Structural basis for molecular interactions involving MRG domains: implications in chromatin biology. *Structure* 20:151-160.

Xie YB, Park JH, Kim DK, Hwang JH, Oh S, Park SB, Shong M, Lee IK, Choi HS (2009) Transcriptional Corepressor SMILE Recruits SIRT1 to Inhibit Nuclear Receptor Estrogen Receptor-related Receptor  $\gamma$  Transactivation. *J Biol Chem* 284:28762-28774.

Yokoyama S, Asahara H (2011) The myogenic transcriptional network. *Cell Mol Life Sci* 68:1843-1849.

Zhang HL, Luo TH, Feng L, Zhao Y, Li WY, Xu J, Zhang Q, Xu LH, Zheng S, Li G, Luo M (2007) Microarray analysis of gene expression in Men1 knockout embryoid body reveals genetic events involved in early mouse embryonic development. *Biochem Biophys Res Commun* 352:456-462.

**List of references cited in Table 2 but not in the main text: transcriptional regulators involved in the coupled inverse coordination of energy production and cardiac contraction**

Douville JM, Cheung DY, Herbert KL, Moffatt T, Wigle JT (2011) Mechanisms of MEOX1 and MEOX2 Regulation of the Cyclin Dependent Kinase Inhibitors p21CIP1/WAF1 and p16INK4a in Vascular Endothelial Cells. *PLoS ONE* 6:e29099.

Reiss-Sklan E, Levitzki A, Naveh-Many T (2009) The complex regulation of HIC (Human I-mfa domain containing protein) expression. *PLoS ONE* 4:e6152.

Saha B, Jyothi Prasanna S, Chandrasekar B, Nandi D (2010) Gene modulation and immunoregulatory roles of Interferon $\gamma$ . *Cytokine* 50:1-14.

Tang X, Yang Y, Amar S (2011) Novel regulation of CCL2 gene expression by murine LITAF and STAT6B. *PLoS ONE* 6:e25083.

Trivedi CM, Cappola TP, Margulies KB, Epstein JA (2011) Homeodomain Only Protein X is down-regulated in human heart failure. *J Mol Cell Cardiol* 50:1056-1058.

Wang Q, Maillard M, Schibler U, Burnier M, Gachon F (2010) Cardiac hypertrophy, low blood pressure, and low aldosterone levels in mice devoid of the three circadian PAR bZip transcription factors DBP, HLF, and TEF. *Am J Physiol Regul Integr Comp Physiol* 299;R1013-R1019.

Wu H, Lin Y, Shi Y, Qian W, Tian Z, Yu Y, Huo K (2010) SIAH-1 interacts with mammalian polyhomeotic homologues HPH2 and affects its stability via the ubiquitin-proteasome pathway. *Biochem Biophys Res Commun* 397:391-396.

Zhou B, Margariti A, Zeng L, Habi O, Xiao Q, Martin D, Wang G, Hu Y, Wang X, Xu Q (2011) Splicing of Histone Deacetylase 7 Modulates Smooth Muscle Cell Proliferation and Neointima Formation Through Nuclear  $\beta$ -Catenin Translocation. *Arterioscler Thromb Vasc Biol* 31:2676-2684.
