# Supplementary material for: Robust coordination of cardiac functions from gene co-expression reveals a versatile combinatorial transcriptional control
Source: Royal Society of Chemistry journal article supplement (doi:10.1039/c4mb00024b), 2014-05-28
Supplement: c4mb00024b2.xlsx [file c4mb00024b2.xlsx]

## Sheet: Feuil1
Supplementary Table 1: Lists of genes and Affymetrix probe sets for each functional gene set in rat and mouse.
Data are log2 values.
Species	Functional gene set	Probe Set ID	Gene Symbol (na32)	Gene Title (na32)	MeanExpr Control	SD Control	MeanExpr Pathological	SD Pathological	Fold Change	q-value (%)	localfdr (%)
Rat	Energy production	1387783_a_at	Acaa1 /// RGD1562373	acetyl-Coenzyme A acyltransferase 1 /// similar to 3-ketoacyl-CoA thiolase B, peroxisomal precursor (Beta-ketothiolase B)	9.02086	0.610293	8.62783	0.359933	0.761532	54.2496	61.7534
Rat	Energy production	1386880_at	Acaa2	acetyl-Coenzyme A acyltransferase 2	12.4902	0.323001	12.3881	0.682719	0.931717	82.0397	89.8102
Rat	Energy production	1367735_at	Acadl	acyl-Coenzyme A dehydrogenase, long-chain	13.2354	0.120349	13.2968	0.158026	1.04348	86.4657	100
Rat	Energy production	1367702_at	Acadm	acyl-Coenzyme A dehydrogenase, C-4 to C-12 straight chain	13.3783	0.19827	13.3877	0.34152	1.00658	86.4657	100
Rat	Energy production	1367828_at	Acads	acyl-Coenzyme A dehydrogenase, C-2 to C-3 short chain	11.2695	0.382778	11.2085	0.358079	0.958584	82.0397	91.7503
Rat	Energy production	1369526_at	Acadsb	acyl-Coenzyme A dehydrogenase, short/branched chain	7.63143	0.515678	7.57467	0.633342	0.961421	82.0397	94.0384
Rat	Energy production	1367897_at	Acadvl	acyl-Coenzyme A dehydrogenase, very long chain	11.6175	0.28553	11.5882	0.394019	0.979903	82.0397	95.2806
Rat	Energy production	1367763_at	Acat1	acetyl-coenzyme A acetyltransferase 1	12.1679	0.350551	12.1578	0.349969	0.993013	84.4986	97.756
Rat	Energy production	1367854_at	Acly	ATP citrate lyase	8.40229	0.192235	8.46588	0.24745	1.04506	86.4657	100
Rat	Energy production	1386916_at	Aco1	aconitase 1, soluble	9.18196	0.244867	9.0842	0.271079	0.934482	70.8252	84.9434
Rat	Energy production	1367589_at	Aco2	aconitase 2, mitochondrial	13.6093	0.202979	13.5861	0.2043	0.984057	82.0397	94.9675
Rat	Energy production	1367680_at	Acox1	acyl-Coenzyme A oxidase 1, palmitoyl	11.6658	0.281403	11.5782	0.409464	0.941047	82.0397	88.4694
Rat	Energy production	1369734_at	Acox3	acyl-Coenzyme A oxidase 3, pristanoyl	7.09236	0.346685	6.95562	0.480175	0.909573	70.8252	84.6511
Rat	Energy production	1370939_at	Acsl1	acyl-CoA synthetase long-chain family member 1	12.0454	0.216692	11.9148	0.320186	0.913431	70.8252	80.8676
Rat	Energy production	1388153_at	Acsl1	acyl-CoA synthetase long-chain family member 1	11.4684	0.217545	11.3876	0.42457	0.945518	82.0397	88.9916
Rat	Energy production	1368177_at	Acsl3	acyl-CoA synthetase long-chain family member 3	7.03631	0.485771	7.0559	0.565493	1.01367	86.4657	100
Rat	Energy production	1387101_at	Acsl4	acyl-CoA synthetase long-chain family member 4	7.05366	0.291512	7.08289	0.271833	1.02047	86.4657	100
Rat	Energy production	1386926_at	Acsl5	acyl-CoA synthetase long-chain family member 5	8.57467	0.298423	8.69826	0.423108	1.08945	86.4657	100
Rat	Energy production	1368182_at	Acsl6	acyl-CoA synthetase long-chain family member 6	7.98252	0.429184	8.07438	0.349985	1.06574	86.4657	100
Rat	Energy production	1367617_at	Aldoa	aldolase A, fructose-bisphosphate	13.8643	0.246542	13.824	0.164456	0.972427	82.0397	92.1837
Rat	Energy production	1368746_a_at	Atp12a	ATPase, H+/K+ transporting, nongastric, alpha polypeptide	6.05031	0.427656	5.91766	0.802831	0.912156	82.0397	88.7256
Rat	Energy production	1388043_at	Atp4a	ATPase, H+/K+ exchanging, alpha polypeptide	7.02233	0.58368	6.77147	0.879783	0.840393	70.8252	82.0507
Rat	Energy production	1370378_at	Atp5a1	ATP synthase, H+ transporting, mitochondrial F1 complex, alpha subunit 1, cardiac muscle	13.7492	0.177483	13.7222	0.161209	0.981445	82.0397	93.8534
Rat	Energy production	1370275_at	Atp5b	ATP synthase, H+ transporting, mitochondrial F1 complex, beta polypeptide	14.1302	0.19378	14.0421	0.124975	0.940798	70.8252	82.8169
Rat	Energy production	1370918_a_at	Atp5c1	ATP synthase, H+ transporting, mitochondrial F1 complex, gamma polypeptide 1	13.8705	0.150703	13.8408	0.160012	0.979631	82.0397	93.1265
Rat	Energy production	1370278_at	Atp5d	ATP synthase, H+ transporting, mitochondrial F1 complex, delta subunit	13.0051	0.206119	12.9484	0.16804	0.961494	82.0397	89.1008
Rat	Energy production	1370284_at	Atp5e	ATP synthase, H+ transporting, mitochondrial F1 complex, epsilon subunit	13.7001	0.141662	13.6527	0.254413	0.967688	82.0397	90.9908
Rat	Energy production	1398855_at	Atp5f1	ATP synthase, H+ transporting, mitochondrial F0 complex, subunit B1	13.4542	0.218269	13.3714	0.142453	0.94423	70.8252	84.6587
Rat	Energy production	1367599_at	Atp5g1	ATP synthase, H+ transporting, mitochondrial F0 complex, subunit C1 (subunit 9)	13.6792	0.219381	13.6079	0.116549	0.951817	70.8252	86.3024
Rat	Energy production	1370207_at	Atp5g2	ATP synthase, H+ transporting, mitochondrial F0 complex, subunit C2 (subunit 9)	12.5645	0.1959	12.5573	0.232043	0.995031	84.4986	97.8119
Rat	Energy production	1367620_at	Atp5g3	ATP synthase, H+ transporting, mitochondrial F0 complex, subunit C3 (subunit 9)	13.8841	0.176051	13.8605	0.164831	0.983809	82.0397	94.517
Rat	Energy production	1367622_at	Atp5h	ATP synthase, H+ transporting, mitochondrial F0 complex, subunit d	13.4137	0.123651	13.4052	0.117925	0.994123	84.4986	97.1231
Rat	Energy production	1387019_at	Atp5i	ATP synthase, H+ transporting, mitochondrial F0 complex, subunit E	11.8994	0.246181	11.7968	0.286479	0.931332	70.8252	84.5457
Rat	Energy production	1377191_at	Atp5i	ATP synthase, H+ transporting, mitochondrial F0 complex, subunit E	6.23213	0.376214	5.90229	0.684158	0.795629	61.8008	70.6841
Rat	Energy production	1370230_at	Atp5j	ATP synthase, H+ transporting, mitochondrial F0 complex, subunit F6	13.2455	0.106625	13.226	0.131985	0.986559	82.0397	94.6476
Rat	Energy production	1371335_at	Atp5l	ATP synthase, H+ transporting, mitochondrial F0 complex, subunit G	13.2822	0.208692	13.3979	0.16972	1.08349	86.4657	100
Rat	Energy production	1370276_at	Atp5o	ATP synthase, H+ transporting, mitochondrial F1 complex, O subunit	13.4886	0.165696	13.4821	0.151899	0.995443	84.4986	97.7258
Rat	Energy production	1382446_at	Atp5s	ATP synthase, H+ transporting, mitochondrial F0 complex, subunit s (factor B)	8.77028	0.220841	8.79051	0.255474	1.01412	86.4657	100
Rat	Energy production	1373212_at	Atp5s	ATP synthase, H+ transporting, mitochondrial F0 complex, subunit s (factor B)	8.32021	0.211117	8.35558	0.189965	1.02482	86.4657	100
Rat	Energy production	1375461_at	Atp5sl	ATP5S-like	9.76044	0.18424	9.86814	0.476238	1.07751	86.4657	100
Rat	Energy production	1389192_at	Atp5sl	ATP5S-like	8.84736	0.24397	8.8067	0.194187	0.972211	82.0397	92.3125
Rat	Energy production	1367873_at	Atp6ap1	ATPase, H+ transporting, lysosomal accessory protein 1	10.5095	0.237694	10.5483	0.307359	1.02723	86.4657	100
Rat	Energy production	1387045_at	Atp6v0a1	ATPase, H+ transporting, lysosomal V0 subunit A1	8.3598	0.316781	8.19243	0.27359	0.890468	68.0484	76.8278
Rat	Energy production	1377020_at	Atp6v0a2	ATPase, H+ transporting, lysosomal V0 subunit A2	8.07602	0.238828	8.18102	0.192705	1.07549	86.4657	100
Rat	Energy production	1398930_at	Atp6v0b	ATPase, H+ transporting, lysosomal 21kDa, V0 subunit b	10.0204	0.19443	10.0531	0.209804	1.02294	86.4657	100
Rat	Energy production	1398755_at	Atp6v0c	ATPase, H+ transporting, lysosomal 16kDa, V0 subunit c	11.9063	0.206096	11.9183	0.20162	1.00834	86.4657	100
Rat	Energy production	1388365_at	Atp6v0d1	ATPase, H+ transporting, lysosomal 38kDa, V0 subunit d1	10.1573	0.222443	10.1815	0.101544	1.01691	86.4657	100
Rat	Energy production	1367724_a_at	Atp6v0e1	ATPase, H+ transporting, lysosomal 9kDa, V0 subunit e1	11.0037	0.299578	10.9788	0.215724	0.982949	82.0397	95.2507
Rat	Energy production	1372907_at	Atp6v0e2	ATPase, H+ transporting V0 subunit e2	9.35064	0.23824	9.35467	0.269552	1.0028	86.4657	99.6619
Rat	Energy production	1374431_at	Atp6v1a	ATPase, H+ transporting, lysosomal V1 subunit A	9.07992	0.170571	9.27914	0.163524	1.14808	65.0227	76.1932
Rat	Energy production	1382048_at	Atp6v1a	ATPase, H+ transporting, lysosomal V1 subunit A	8.02247	0.259624	8.06786	0.24151	1.03196	86.4657	100
Rat	Energy production	1387664_at	Atp6v1b2	ATPase, H transporting, lysosomal V1 subunit B2	9.50923	0.239226	9.55044	0.304651	1.02898	86.4657	100
Rat	Energy production	1371402_at	Atp6v1b2	ATPase, H transporting, lysosomal V1 subunit B2	9.29302	0.151993	9.41792	0.171653	1.09043	86.2609	100
Rat	Energy production	1374396_at	Atp6v1c1	ATPase, H+ transporting, lysosomal V1 subunit C1	8.87801	0.179382	8.94227	0.164865	1.04554	86.4657	100
Rat	Energy production	1388325_at	Atp6v1d	ATPase, H+ transporting, lysosomal V1 subunit D	11.1412	0.200143	11.3189	0.16139	1.13109	84.5192	87.512
Rat	Energy production	1371564_at	Atp6v1e1	ATPase, H+ transporting, lysosomal V1 subunit E1	10.802	0.146216	10.9209	0.143503	1.08591	86.2192	100
Rat	Energy production	1398781_at	Atp6v1f	ATPase, H transporting, lysosomal V1 subunit F	10.6018	0.257562	10.6518	0.181827	1.03532	86.4657	100
Rat	Energy production	1398905_at	Atp6v1g1	ATPase, H transporting, lysosomal V1 subunit G1	9.28385	0.192315	9.22179	0.163271	0.957895	82.0397	87.9423
Rat	Energy production	1367718_at	Chkb	choline kinase beta	9.41464	0.193161	9.25286	0.185594	0.893919	61.8008	71.3341
Rat	Energy production	1375922_at	Cox15	COX15 homolog, cytochrome c oxidase assembly protein (yeast)	9.23014	0.452091	9.50176	0.273258	1.20716	84.5192	87.8086
Rat	Energy production	1369984_at	Cox17	COX17 cytochrome c oxidase assembly homolog (S. cerevisiae)	11.051	0.173375	11.0881	0.195012	1.02604	86.4657	100
Rat	Energy production	1389596_at	Cox18	COX18 cytochrome c oxidase assembly homolog (S. cerevisiae)	9.26207	0.228228	9.22273	0.153925	0.973097	82.0397	92.0891
Rat	Energy production	1372891_at	Cox19	COX19 cytochrome c oxidase assembly homolog (S. cerevisiae)	8.9309	0.141965	8.93688	0.159412	1.00415	86.4657	100
Rat	Energy production	1367607_at	Cox4i1	cytochrome c oxidase subunit IV isoform 1	13.7469	0.128494	13.695	0.195797	0.964666	82.0397	89.32
Rat	Energy production	1368648_at	Cox4i2	cytochrome c oxidase subunit IV isoform 2	8.16134	0.404755	7.89409	0.509259	0.830904	65.0227	72.7425
Rat	Energy production	1371658_at	Cox4nb	COX4 neighbor	7.87276	0.384894	7.87154	0.328834	0.999152	84.4986	98.8903
Rat	Energy production	1370888_at	Cox5a	cytochrome c oxidase, subunit Va	13.6014	0.131708	13.593	0.114273	0.994223	84.4986	97.1716
Rat	Energy production	1375127_at	Cox5a	Cytochrome c oxidase, subunit Va	8.7623	0.55928	8.31813	0.666127	0.73501	55.8888	63.2047
Rat	Energy production	1386887_at	Cox5b	cytochrome c oxidase subunit Vb	13.8398	0.224124	13.7862	0.133727	0.963516	82.0397	89.5112
Rat	Energy production	1370861_at	Cox6a1	cytochrome c oxidase, subunit VIa, polypeptide 1	12.1242	0.194851	12.2212	0.223319	1.06948	86.4657	100
Rat	Energy production	1367782_at	Cox6a2	cytochrome c oxidase, subunit VIa, polypeptide 2	13.7406	0.130813	13.7434	0.208536	1.00194	86.4657	99.5704
Rat	Energy production	1367757_at	Cox6c	cytochrome c oxidase, subunit VIc	13.8116	0.164402	13.7233	0.159909	0.940584	70.8252	82.7146
Rat	Energy production	1370767_at	Cox6c1	cytochrome c oxidase subunit VIc-1	8.07421	0.362894	8.00254	0.482607	0.951536	82.0397	91.3077
Rat	Energy production	1367629_at	Cox7a2	cytochrome c oxidase subunit VIIa polypeptide 2	13.7787	0.113112	13.7105	0.162727	0.953865	70.8252	85.5223
Rat	Energy production	1371337_at	Cox7a2l	cytochrome c oxidase subunit VIIa polypeptide 2 like	11.5289	0.2564	11.5729	0.133834	1.03101	86.4657	100
Rat	Energy production	1371387_at	Cox7b	cytochrome c oxidase subunit VIIb	13.5727	0.117286	13.5705	0.107219	0.9985	84.4986	98.5417
Rat	Energy production	1389820_at	Cox7c	cytochrome c oxidase, subunit VIIc	13.3987	0.178446	13.432	0.135726	1.0234	86.4657	100
Rat	Energy production	1388113_at	Cox8a	cytochrome c oxidase subunit VIIIa	12.7769	0.115793	12.8218	0.148231	1.03157	86.4657	100
Rat	Energy production	1367739_at	Cox8b	cytochrome c oxidase, subunit VIIIb	13.5839	0.198987	13.4913	0.160586	0.937826	70.8252	82.8252
Rat	Energy production	1386946_at	Cpt1a	carnitine palmitoyltransferase 1a, liver	9.1673	0.310363	8.96926	0.374602	0.871735	65.0227	75.1896
Rat	Energy production	1367836_at	Cpt1a	carnitine palmitoyltransferase 1a, liver	8.8376	0.434791	8.55964	0.424419	0.824752	61.8008	70.3052
Rat	Energy production	1367742_at	Cpt1b	carnitine palmitoyltransferase 1b, muscle	12.2687	0.23512	12.2492	0.277409	0.986538	84.4986	96.021
Rat	Energy production	1386927_at	Cpt2	carnitine palmitoyltransferase 2	11.259	0.237958	11.1925	0.404384	0.954958	82.0397	90.5754
Rat	Energy production	1371886_at	Crat	carnitine acetyltransferase	10.7698	0.189675	10.7284	0.404873	0.971712	82.0397	93.4737
Rat	Energy production	1375295_at	Cs	Citrate synthase	12.9216	0.202474	12.8693	0.325204	0.964421	82.0397	91.4243
Rat	Energy production	1369967_at	Cs	citrate synthase	11.6699	0.386081	11.667	0.376248	0.998022	84.4986	98.7011
Rat	Energy production	1371342_at	Cyc1	cytochrome c-1	13.3857	0.183597	13.3112	0.229994	0.949687	70.8252	86.823
Rat	Energy production	1367659_s_at	Dci	dodecenoyl-Coenzyme A delta isomerase (3,2 trans-enoyl-Coenzyme A isomerase)	11.8999	0.248538	11.8867	0.44626	0.990884	84.4986	97.3951
Rat	Energy production	1370961_at	Dci	dodecenoyl-Coenzyme A delta isomerase (3,2 trans-enoyl-Coenzyme A isomerase)	6.95463	0.585369	6.92543	0.656734	0.97997	84.4986	96.5923
Rat	Energy production	1388194_at	Dlat	dihydrolipoamide S-acetyltransferase	10.4527	0.251949	10.5863	0.396343	1.09707	86.4657	100
Rat	Energy production	1373016_at	Dld	dihydrolipoamide dehydrogenase	11.6458	0.226281	11.7857	0.248689	1.10179	86.4657	100
Rat	Energy production	1370879_at	Dlst	dihydrolipoamide S-succinyltransferase (E2 component of 2-oxo-glutarate complex)	12.3272	0.197619	12.3065	0.206036	0.985778	82.0397	95.3883
Rat	Energy production	1367829_at	Echs1	enoyl Coenzyme A hydratase, short chain, 1, mitochondrial	11.4289	0.386286	11.4137	0.463973	0.989483	84.4986	97.3479
Rat	Energy production	1368283_at	Ehhadh	enoyl-Coenzyme A, hydratase/3-hydroxyacyl Coenzyme A dehydrogenase	6.41183	0.607599	6.26665	0.534192	0.904266	70.8252	86.8124
Rat	Energy production	1367575_at	Eno1	enolase 1, (alpha)	12.1414	0.531457	12.6609	0.351495	1.43341	25.9276	46.9002
Rat	Energy production	1370341_at	Eno2	enolase 2, gamma, neuronal	6.61694	0.494288	6.34662	0.43332	0.829135	65.0227	72.6405
Rat	Energy production	1386907_at	Eno3	enolase 3, beta, muscle	11.4293	0.451286	11.109	0.488345	0.80088	60.0051	67.9001
Rat	Energy production	1368077_at	Fbp1	fructose-1,6-bisphosphatase 1	5.52584	0.839161	5.76623	0.747665	1.18131	86.4657	100
Rat	Energy production	1368622_at	Fbp2	fructose-1,6-bisphosphatase 2	6.06586	0.824697	6.01327	0.621209	0.964208	82.0397	95.1673
Rat	Energy production	1367670_at	Fh1	fumarate hydratase 1	12.5302	0.203519	12.4246	0.206179	0.929426	70.8252	81.7172
Rat	Energy production	1386944_a_at	G6pc	glucose-6-phosphatase, catalytic subunit	8.34776	0.327651	8.27825	0.337454	0.952962	82.0397	90.2312
Rat	Energy production	1370725_a_at	G6pc	glucose-6-phosphatase, catalytic subunit	5.57053	0.811196	5.6224	1.0248	1.03661	86.4657	100
Rat	Energy production	1379250_at	Galm	galactose mutarotase (aldose 1-epimerase)	7.26204	0.426189	7.2596	0.422153	0.998315	84.4986	98.7728
Rat	Energy production	1385072_at	Galm	galactose mutarotase (aldose 1-epimerase)	7.12462	0.298969	6.97955	0.44136	0.904337	70.8252	82.6496
Rat	Energy production	1367557_s_at	Gapdh /// Gapdh-ps2 /// LOC687270 /// RGD1564688	glyceraldehyde-3-phosphate dehydrogenase /// glyceraldehyde-3-phosphate dehydrogenase, pseudogene 2 /// similar to glyceraldehyde-3-phosphate dehydrogenase /// similar to glyceraldehyde-3-phosphate dehydrogenase	14.2093	0.237382	14.0872	0.211887	0.91888	70.8252	80.0008
Rat	Energy production	1388788_at	Gcdh	glutaryl-Coenzyme A dehydrogenase	10.5797	0.276388	10.6214	0.366537	1.02935	86.4657	100
Rat	Energy production	1387312_a_at	Gck	glucokinase	6.92661	0.246425	6.51796	0.357118	0.753326	41.3607	45.1149
Rat	Energy production	1370237_at	Hadh	hydroxyacyl-Coenzyme A dehydrogenase	12.8259	0.177591	12.6908	0.36743	0.910607	70.8252	80.8605
Rat	Energy production	1370164_at	Hadha	hydroxyacyl-Coenzyme A dehydrogenase/3-ketoacyl-Coenzyme A thiolase/enoyl-Coenzyme A hydratase (trifunctional protein), alpha subunit	11.9924	0.393215	11.8355	0.519509	0.896935	70.8252	83.6353
Rat	Energy production	1367694_at	Hadhb	hydroxyacyl-Coenzyme A dehydrogenase/3-ketoacyl-Coenzyme A thiolase/enoyl-Coenzyme A hydratase (trifunctional protein), beta subunit	13.1433	0.236678	13.0939	0.368445	0.966316	82.0397	92.3598
Rat	Energy production	1386929_at	Hk1	hexokinase 1	10.5247	0.340253	10.4585	0.139817	0.955201	82.0397	89.3384
Rat	Energy production	1383519_at	Hk2	Hexokinase 2	8.68562	0.795146	8.96524	0.50491	1.21388	86.4657	100
Rat	Energy production	1369006_at	Hk2	hexokinase 2	7.64504	0.637816	7.70871	0.602739	1.04512	86.4657	100
Rat	Energy production	1367662_at	Hsd17b10	hydroxysteroid (17-beta) dehydrogenase 10	11.9552	0.185149	11.8704	0.265798	0.942936	70.8252	85.9004
Rat	Energy production	1367672_at	Hsd17b4	hydroxysteroid (17-beta) dehydrogenase 4	10.4648	0.190858	10.446	0.15563	0.987042	82.0397	95.4507
Rat	Energy production	1369954_at	Idh1	isocitrate dehydrogenase 1 (NADP+), soluble	10.7351	0.311206	10.7785	0.291006	1.03059	86.4657	100
Rat	Energy production	1388403_at	Idh2	isocitrate dehydrogenase 2 (NADP+), mitochondrial	13.8482	0.174014	13.8462	0.129428	0.998554	84.4986	98.6201
Rat	Energy production	1367911_at	Idh3a	isocitrate dehydrogenase 3 (NAD+) alpha	11.1182	0.257058	11.2158	0.438186	1.06992	86.4657	100
Rat	Energy production	1388160_a_at	Idh3B	isocitrate dehydrogenase 3 (NAD+) beta	12.7193	0.145763	12.7912	0.182699	1.05109	86.4657	100
Rat	Energy production	1370865_at	Idh3g	isocitrate dehydrogenase 3 (NAD), gamma	12.55	0.156063	12.519	0.148045	0.978741	82.0397	92.8169
Rat	Energy production	1367586_at	Ldha	lactate dehydrogenase A	12.9535	0.132961	12.9479	0.162492	0.996102	84.4986	97.8809
Rat	Energy production	1370218_at	Ldhb	lactate dehydrogenase B	14.0529	0.206673	14.0581	0.188129	1.0036	86.4657	99.9556
Rat	Energy production	1372860_at	Lhpp	phospholysine phosphohistidine inorganic pyrophosphate phosphatase	6.82259	0.362383	6.75524	0.31245	0.954387	82.0397	90.5751
Rat	Energy production	1389964_at	LOC683884 /// Ndufab1	similar to Acyl carrier protein, mitochondrial precursor (ACP) (NADH-ubiquinone oxidoreductase 9.6 kDa subunit) (CI-SDAP) /// NADH dehydrogenase (ubiquinone) 1, alpha/beta subcomplex, 1	13.0964	0.127427	13.0896	0.193789	0.995328	84.4986	97.7125
Rat	Energy production	1371321_at	LOC688869	similar to cytochrome c oxidase, subunit VIb polypeptide 1	13.0937	0.136406	13.057	0.134811	0.974943	82.0397	91.3919
Rat	Energy production	1367653_a_at	Mdh1	malate dehydrogenase 1, NAD (soluble)	13.8549	0.198968	13.8166	0.187452	0.973774	82.0397	92.2332
Rat	Energy production	1372790_at	Mdh1	Malate dehydrogenase 1, NAD (soluble)	11.4657	0.247314	11.4789	0.445302	1.0092	86.4657	100
Rat	Energy production	1369927_at	Mdh2	malate dehydrogenase 2, NAD (mitochondrial)	13.1106	0.205675	13.0902	0.281031	0.985943	84.4986	95.8067
Rat	Energy production	1388391_at	Ndufa1	NADH dehydrogenase (ubiquinone) 1 alpha subcomplex, 1	13.4959	0.0928282	13.4675	0.131118	0.980536	82.0397	92.6014
Rat	Energy production	1389334_at	Ndufa10 /// Ndufa10l1	NADH dehydrogenase (ubiquinone) 1 alpha subcomplex 10 /// NADH dehydrogenase (ubiquinone) 1 alpha subcomplex 10-like 1	12.2306	0.356518	12.061	0.618635	0.889042	70.8252	83.4661
Rat	Energy production	1375220_at	Ndufa11	NADH dehydrogenase (ubiquinone) 1 alpha subcomplex 11	12.3801	0.145159	12.4137	0.203647	1.02358	86.4657	100
Rat	Energy production	1371605_at	Ndufa12	NADH dehydrogenase (ubiquinone) 1 alpha subcomplex, 12	13.0817	0.0866306	13.0931	0.121616	1.00796	86.4657	100
Rat	Energy production	1388362_at	Ndufa13 /// Yjefn3	NADH dehydrogenase (ubiquinone) 1 alpha subcomplex, 13 /// YjeF N-terminal domain containing 3	12.8359	0.134498	12.8172	0.161276	0.987089	82.0397	95.1844
Rat	Energy production	1389288_at	Ndufa2	NADH dehydrogenase (ubiquinone) 1 alpha subcomplex, 2	12.1895	0.196379	12.1802	0.179523	0.99363	84.4986	97.3466
Rat	Energy production	1388489_at	Ndufa3	NADH dehydrogenase (ubiquinone) 1 alpha subcomplex, 3	12.5034	0.209993	12.4847	0.244499	0.987106	84.4986	95.9404
Rat	Energy production	1371323_at	Ndufa4	NADH dehydrogenase (ubiquinone) 1 alpha subcomplex, 4	13.4266	0.0931276	13.472	0.182774	1.03197	86.4657	100
Rat	Energy production	1386951_at	Ndufa5	NADH dehydrogenase (ubiquinone) 1 alpha subcomplex 5	11.2857	0.356318	11.151	0.326874	0.910852	70.8252	82.7898
Rat	Energy production	1379243_at	Ndufa6	NADH dehydrogenase (ubiquinone) 1 alpha subcomplex, 6 (B14)	12.676	0.172547	12.6232	0.103766	0.964066	82.0397	88.4941
Rat	Energy production	1375411_at	Ndufa7	NADH dehydrogenase (ubiquinone) 1 alpha subcomplex, 7 (B14.5a)	12.4399	0.21873	12.3874	0.169776	0.964235	82.0397	89.9526
Rat	Energy production	1371355_at	Ndufa8	NADH dehydrogenase (ubiquinone) 1 alpha subcomplex, 8	12.4553	0.126877	12.4439	0.134265	0.992142	84.4986	96.5561
Rat	Energy production	1388323_at	Ndufa9	NADH dehydrogenase (ubiquinone) 1 alpha subcomplex, 9	12.7154	0.155501	12.7718	0.25514	1.03991	86.4657	100
Rat	Energy production	1388315_at	Ndufb11	NADH dehydrogenase (ubiquinone) 1 beta subcomplex, 11	13.3658	0.127071	13.3163	0.149823	0.966274	82.0397	89.0082
Rat	Energy production	1389012_at	Ndufb2	NADH dehydrogenase (ubiquinone) 1 beta subcomplex, 2	12.5116	0.0863457	12.4936	0.145146	0.987607	82.0397	94.9792
Rat	Energy production	1373041_at	Ndufb3	NADH dehydrogenase (ubiquinone) 1 beta subcomplex 3	13.2201	0.112793	13.1893	0.184957	0.978903	82.0397	92.8822
Rat	Energy production	1371371_at	Ndufb4	NADH dehydrogenase (ubiquinone) 1 beta subcomplex 4	13.0579	0.115222	13.0784	0.125747	1.01431	86.4657	100
Rat	Energy production	1388304_at	Ndufb5	NADH dehydrogenase (ubiquinone) 1 beta subcomplex, 5	13.082	0.170816	13.0393	0.181294	0.970849	82.0397	91.165
Rat	Energy production	1371346_at	Ndufb6	NADH dehydrogenase (ubiquinone) 1 beta subcomplex, 6	12.4109	0.199308	12.5328	0.164736	1.08812	86.4657	100
Rat	Energy production	1388343_at	Ndufb7	NADH dehydrogenase (ubiquinone) 1 beta subcomplex, 7	12.2753	0.18854	12.2782	0.161318	1.00202	86.4657	99.5912
Rat	Energy production	1375628_at	Ndufb8	NADH dehydrogenase (ubiquinone) 1 beta subcomplex 8	10.3135	0.312355	10.239	0.207262	0.949678	82.0397	88.3126
Rat	Energy production	1371701_at	Ndufb9	NADH dehydrogenase (ubiquinone) 1 beta subcomplex, 9	13.7874	0.141094	13.7275	0.139965	0.959322	70.8252	87.0994
Rat	Energy production	1392530_at	Ndufc1	NADH dehydrogenase (ubiquinone) 1, subcomplex unknown, 1	12.6471	0.0968644	12.6699	0.107175	1.01592	86.4657	100
Rat	Energy production	1375516_at	Ndufc2	NADH dehydrogenase (ubiquinone) 1, subcomplex unknown, 2	12.5241	0.152375	12.5953	0.248127	1.05065	86.4657	100
Rat	Energy production	1371577_at	Ndufs1	NADH dehydrogenase (ubiquinone) Fe-S protein 1	12.3003	0.252879	12.3142	0.395022	1.00964	86.4657	100
Rat	Energy production	1371482_at	Ndufs2	NADH dehydrogenase (ubiquinone) Fe-S protein 2	12.6399	0.311285	12.731	0.256924	1.06517	86.4657	100
Rat	Energy production	1388364_at	Ndufs3	NADH dehydrogenase (ubiquinone) Fe-S protein 3	12.5882	0.149545	12.523	0.225824	0.955763	82.0397	87.7943
Rat	Energy production	1372147_at	Ndufs4	NADH dehydrogenase (ubiquinone) Fe-S protein 4	9.56475	0.367533	9.69835	0.333777	1.09703	86.4657	100
Rat	Energy production	1388414_at	Ndufs5	NADH dehydrogenase (ubiquinone) Fe-S protein 5	12.7027	0.130161	12.7114	0.152895	1.00608	86.4657	100
Rat	Energy production	1370006_at	Ndufs6	NADH dehydrogenase (ubiquinone) Fe-S protein 6	12.8443	0.0989175	12.8375	0.12831	0.995266	84.4986	97.4645
Rat	Energy production	1371912_at	Ndufs7	NADH dehydrogenase (ubiquinone) Fe-S protein 7	12.5349	0.162375	12.4823	0.232068	0.964236	82.0397	90.0536
Rat	Energy production	1388326_at	Ndufs8	NADH dehydrogenase (ubiquinone) Fe-S protein 8	12.0085	0.152296	11.9418	0.15224	0.954843	70.8252	86.2734
Rat	Energy production	1371416_at	Ndufv1	NADH dehydrogenase (ubiquinone) flavoprotein 1	12.9153	0.217771	12.9231	0.238746	1.00545	86.4657	100
Rat	Energy production	1371041_at	Ndufv2	NADH dehydrogenase (ubiquinone) flavoprotein 2	13.283	0.131517	13.2722	0.106975	0.992533	84.4986	96.5945
Rat	Energy production	1386917_at	Pc	pyruvate carboxylase	7.68025	0.327048	7.58722	0.186585	0.937549	70.8252	85.8348
Rat	Energy production	1372264_at	Pck1	phosphoenolpyruvate carboxykinase 1 (soluble)	5.93015	0.772512	5.76328	0.963573	0.890769	82.0397	88.8968
Rat	Energy production	1376247_at	Pck2	phosphoenolpyruvate carboxykinase 2 (mitochondrial)	6.33573	0.41246	6.1586	0.62626	0.884466	70.8252	83.3677
Rat	Energy production	1375213_at	Pck2	phosphoenolpyruvate carboxykinase 2 (mitochondrial)	5.75016	0.833942	5.60835	1.12551	0.906379	82.0397	91.1426
Rat	Energy production	1371380_at	Pdha1	pyruvate dehydrogenase (lipoamide) alpha 1	12.8978	0.145373	12.8605	0.178553	0.974454	82.0397	91.8393
Rat	Energy production	1383698_at	Pdha1	pyruvate dehydrogenase (lipoamide) alpha 1	11.5658	0.373667	11.6133	0.379099	1.03344	86.4657	100
Rat	Energy production	1369429_at	Pdha2	pyruvate dehydrogenase (lipoamide) alpha 2	2.9881	1.24976	2.89181	1.39807	0.935437	82.0397	94.7684
Rat	Energy production	1371388_at	Pdhb	pyruvate dehydrogenase (lipoamide) beta	12.5128	0.148572	12.4964	0.198483	0.988689	84.4986	95.9166
Rat	Energy production	1398429_at	Pdhx	pyruvate dehydrogenase complex, component X	10.1488	0.223749	10.239	0.265736	1.06453	86.4657	100
Rat	Energy production	1368079_at	Pdk1	pyruvate dehydrogenase kinase, isozyme 1	10.7147	0.134545	10.6686	0.231484	0.968577	82.0397	90.8692
Rat	Energy production	1367892_at	Pdk2	pyruvate dehydrogenase kinase, isozyme 2	12.0462	0.318965	12.0091	0.295643	0.974611	82.0397	93.9478
Rat	Energy production	1372229_at	Pdk3	pyruvate dehydrogenase kinase, isozyme 3	6.515	0.263871	6.46694	0.422009	0.967231	82.0397	93.0335
Rat	Energy production	1369150_at	Pdk4	pyruvate dehydrogenase kinase, isozyme 4	9.21572	0.745652	9.41759	0.614808	1.15019	86.4657	100
Rat	Energy production	1368910_at	Pdp1	pyruvate dehyrogenase phosphatase catalytic subunit 1	10.0683	0.425553	10.0613	0.422736	0.995168	84.4986	98.2649
Rat	Energy production	1370509_at	Pdp2	pyruvate dehyrogenase phosphatase catalytic subunit 2	8.34056	0.309783	8.30152	0.521644	0.973302	82.0397	94.7409
Rat	Energy production	1367743_at	Pfkl	phosphofructokinase, liver	8.45817	0.32592	8.48981	0.428899	1.02217	86.4657	100
Rat	Energy production	1367864_at	Pfkm	phosphofructokinase, muscle	12.3922	0.354538	12.2888	0.383989	0.930854	70.8252	87.0868
Rat	Energy production	1386961_at	Pfkm	phosphofructokinase, muscle	11.3258	0.518139	11.2106	0.518518	0.923279	82.0397	88.4918
Rat	Energy production	1372182_at	Pfkp	phosphofructokinase, platelet	8.29463	0.231668	8.53494	0.221195	1.18125	61.8008	73.8886
Rat	Energy production	1386864_at	Pgam1	phosphoglycerate mutase 1 (brain)	11.684	0.232341	11.9107	0.267557	1.17015	84.4533	82.9976
Rat	Energy production	1367951_at	Pgam2	phosphoglycerate mutase 2 (muscle)	12.7135	0.257497	12.728	0.332883	1.01005	86.4657	100
Rat	Energy production	1388318_at	Pgk1	phosphoglycerate kinase 1	12.4806	0.125772	12.5423	0.17612	1.04372	86.4657	100
Rat	Energy production	1387361_s_at	Pgk1	phosphoglycerate kinase 1	11.7037	0.217944	11.6464	0.248621	0.96108	82.0397	90.0461
Rat	Energy production	1388634_at	Pgm1	phosphoglucomutase 1	11.2228	0.270785	11.3344	0.197432	1.0804	86.4657	100
Rat	Energy production	1369473_at	Pgm1	phosphoglucomutase 1	10.2469	0.30967	10.3797	0.375425	1.09642	86.4657	100
Rat	Energy production	1373769_at	Pgm2	phosphoglucomutase 2	6.86104	0.516554	6.66371	0.620034	0.872165	70.8252	82.5288
Rat	Energy production	1368651_at	Pklr	pyruvate kinase, liver and RBC	6.66541	0.592971	6.64302	0.671786	0.984602	84.4986	97.19
Rat	Energy production	1369931_at	Pkm2	pyruvate kinase, muscle	12.5085	0.254059	12.4499	0.273424	0.960201	82.0397	90.4404
Rat	Energy production	1372827_at	Ppid	peptidylprolyl isomerase D (cyclophilin D)	10.0659	0.126445	10.1978	0.260156	1.09572	86.4657	100
Rat	Energy production	1367678_at	Sdha	succinate dehydrogenase complex, subunit A, flavoprotein (Fp)	12.8575	0.19229	12.7506	0.175511	0.928555	70.8252	80.4696
Rat	Energy production	1372123_at	Sdhb	succinate dehydrogenase complex, subunit B, iron sulfur (Ip)	13.3429	0.157247	13.288	0.130877	0.962672	82.0397	88.1777
Rat	Energy production	1371311_at	Sdhc	succinate dehydrogenase complex, subunit C, integral membrane protein	12.692	0.133377	12.7475	0.170027	1.03922	86.4657	100
Rat	Energy production	1388294_at	Sdhd	succinate dehydrogenase complex, subunit D, integral membrane protein	13.0255	0.164274	13.0308	0.190388	1.00367	86.4657	100
Rat	Energy production	1371296_at	Sdhd	succinate dehydrogenase complex, subunit D, integral membrane protein	12.6222	0.146968	12.7434	0.258752	1.08766	86.4657	100
Rat	Energy production	1387103_s_at	Slc25a14	solute carrier family 25 (mitochondrial carrier, brain), member 14	6.40726	0.618476	6.60785	0.810066	1.14917	86.4657	100
Rat	Energy production	1398249_at	Slc25a20	solute carrier family 25 (carnitine/acylcarnitine translocase), member 20	10.6246	0.236671	10.6524	0.511739	1.01948	86.4657	100
Rat	Energy production	1387433_a_at	Slc25a27	solute carrier family 25, member 27	6.06413	0.420791	5.89079	0.469825	0.886787	70.8252	81.6254
Rat	Energy production	1388975_at	Sucla2	succinate-CoA ligase, ADP-forming, beta subunit	12.2962	0.215254	12.2907	0.239681	0.996223	84.4986	98.1389
Rat	Energy production	1383438_at	Sucla2	Succinate-CoA ligase, ADP-forming, beta subunit	5.56824	1.03318	5.60758	0.807237	1.02765	86.4657	100
Rat	Energy production	1367642_at	Suclg1	succinate-CoA ligase, alpha subunit	11.9559	0.238471	11.9651	0.364912	1.00638	86.4657	100
Rat	Energy production	1373017_at	Suclg2	succinate-CoA ligase, GDP-forming, beta subunit	11.2547	0.194418	11.3344	0.296159	1.0568	86.4657	100
Rat	Energy production	1367603_at	Tpi1	triosephosphate isomerase 1	12.85	0.206087	12.901	0.176891	1.03599	86.4657	100
Rat	Energy production	1368669_at	Ucp2	uncoupling protein 2 (mitochondrial, proton carrier)	10.7177	0.324909	10.5544	0.401896	0.892984	70.8252	80.1765
Rat	Energy production	1387681_at	Ucp3	uncoupling protein 3 (mitochondrial, proton carrier)	7.84401	0.44402	7.67882	0.485973	0.891811	70.8252	82.9506
Rat	Energy production	1375197_at	Uqcr	ubiquinol-cytochrome c reductase, 6.4kDa subunit	12.6454	0.187535	12.7125	0.17145	1.04765	86.4657	100
Rat	Energy production	1374426_at	Uqcrb	ubiquinol-cytochrome c reductase binding protein	13.3389	0.115786	13.3336	0.119099	0.996337	84.4986	97.8354
Rat	Energy production	1388301_at	Uqcrc1	ubiquinol-cytochrome c reductase core protein I	13.5106	0.220913	13.4681	0.304015	0.970986	82.0397	92.7114
Rat	Energy production	1373362_at	Uqcrc2	ubiquinol cytochrome c reductase core protein 2	12.9944	0.138533	13.0443	0.255362	1.03519	86.4657	100
Rat	Energy production	1371254_at	Uqcrfs1	ubiquinol-cytochrome c reductase, Rieske iron-sulfur polypeptide 1	13.742	0.182638	13.6934	0.14822	0.966852	82.0397	89.9081
Rat	Energy production	1371415_at	Uqcrh	ubiquinol-cytochrome c reductase hinge protein	13.2519	0.175062	13.2395	0.179637	0.99139	84.4986	96.6775
Rat	Energy production	1371417_at	Uqcrq	ubiquinol-cytochrome c reductase, complex III subunit VII	13.1894	0.142032	13.2951	0.211208	1.07605	86.4657	100
Rat	Energy production	1367706_at	Vdac1	voltage-dependent anion channel 1	12.8956	0.385119	12.8573	0.263457	0.973821	82.0397	94.018
Rat	Energy production	1386909_a_at	Vdac1	voltage-dependent anion channel 1	11.417	0.71031	11.3901	0.52424	0.981582	84.4986	96.7972
Rat	Energy production	1369933_at	Vdac2	voltage-dependent anion channel 2	12.7474	0.1439	12.6625	0.144415	0.942851	70.8252	82.474
Rat	Energy production	1386902_at	Vdac3	voltage-dependent anion channel 3	13.1426	0.107813	13.1929	0.156933	1.03548	86.4657	100
Rat	Cardiac contraction	1369928_at	Acta1	actin, alpha 1, skeletal muscle	13.6736	0.187943	13.764	0.271174	1.06471	86.4657	100
Rat	Cardiac contraction	1370857_at	Acta2	smooth muscle alpha-actin	9.67893	0.347286	9.48968	0.584459	0.877062	70.8252	81.0269
Rat	Cardiac contraction	1370856_at	Actc1	actin, alpha, cardiac muscle 1	14.4568	0.251471	14.4092	0.181833	0.96749	82.0397	91.2031
Rat	Cardiac contraction	1374352_at	Actc1	actin, alpha, cardiac muscle 1	14.2243	0.305815	14.1094	0.245888	0.923426	70.8252	83.2035
Rat	Cardiac contraction	1374353_x_at	Actc1	actin, alpha, cardiac muscle 1	13.8029	0.185622	13.7623	0.17928	0.972252	82.0397	91.6513
Rat	Cardiac contraction	1371327_a_at	Actg1	actin, gamma 1	12.4355	0.343111	12.6066	0.353647	1.12591	86.4657	100
Rat	Cardiac contraction	1386869_at	Actg2	actin, gamma 2, smooth muscle, enteric	7.33977	0.41175	7.6061	0.690171	1.20274	86.4657	100
Rat	Cardiac contraction	1389189_at	Actn1	actinin, alpha 1	8.18255	0.41091	8.25366	0.417317	1.05052	86.4657	100
Rat	Cardiac contraction	1398294_at	Actn1	actinin, alpha 1	7.94098	0.450798	7.90528	0.544589	0.975554	82.0397	95.5111
Rat	Cardiac contraction	1372595_at	Actn2	actinin alpha 2	13.458	0.178258	13.4226	0.209315	0.975776	82.0397	92.7522
Rat	Cardiac contraction	1369942_at	Actn4	actinin alpha 4	9.88284	0.460111	9.89851	0.379576	1.01092	86.4657	100
Rat	Cardiac contraction	1367978_at	Adcy2	adenylate cyclase 2 (brain)	6.95395	0.508883	6.68462	0.460231	0.829705	65.0227	73.5421
Rat	Cardiac contraction	1387128_at	Adcy3	adenylate cyclase 3	6.56525	0.747753	6.55015	0.802736	0.989584	84.4986	97.9811
Rat	Cardiac contraction	1368370_at	Adcy4	adenylate cyclase 4	7.59259	0.305668	7.56059	0.285169	0.978068	82.0397	94.5246
Rat	Cardiac contraction	1367644_at	Adcy6	adenylate cyclase 6	9.54849	0.303276	9.32892	0.449695	0.858819	65.0227	74.4703
Rat	Cardiac contraction	1386876_at	Adcy6	adenylate cyclase 6	7.86191	0.674116	7.89321	0.396658	1.02193	86.4657	100
Rat	Cardiac contraction	1387673_a_at	Anxa6	annexin A6	10.458	0.247782	10.2869	0.173184	0.888116	61.8008	71.557
Rat	Cardiac contraction	1368108_at	Atp2a1	ATPase, Ca++ transporting, cardiac muscle, fast twitch 1	6.95228	0.653705	6.49364	1.10829	0.727675	65.0227	72.607
Rat	Cardiac contraction	1369065_a_at	Atp2a2	ATPase, Ca++ transporting, cardiac muscle, slow twitch 2	14.3746	0.234151	14.2948	0.160122	0.946161	70.8252	85.7354
Rat	Cardiac contraction	1370426_a_at	Atp2a2	ATPase, Ca++ transporting, cardiac muscle, slow twitch 2	11.1836	0.334307	11.2242	0.323488	1.02849	86.4657	100
Rat	Cardiac contraction	1398862_at	Atp2a2	ATPase, Ca++ transporting, cardiac muscle, slow twitch 2	9.2162	0.496311	9.16895	0.49843	0.967776	82.0397	94.3724
Rat	Cardiac contraction	1375164_at	Atp2a2	ATPase, Ca++ transporting, cardiac muscle, slow twitch 2	6.01384	0.720702	5.3849	1.10092	0.646652	54.2496	62.6795
Rat	Cardiac contraction	1368477_at	Atp2a3	ATPase, Ca++ transporting, ubiquitous	7.75615	0.41981	7.61007	0.380502	0.903702	70.8252	83.2105
Rat	Cardiac contraction	1371165_a_at	Atp2a3	ATPase, Ca++ transporting, ubiquitous	6.61439	0.884596	6.77914	0.775328	1.12098	86.4657	100
Rat	Cardiac contraction	1370050_at	Atp2b1	ATPase, Ca++ transporting, plasma membrane 1	8.82438	0.613507	8.78859	0.312669	0.9755	82.0397	95.4347
Rat	Cardiac contraction	1368698_at	Atp2b2	ATPase, Ca++ transporting, plasma membrane 2	7.55085	0.300201	7.44174	0.35269	0.927163	70.8252	85.4528
Rat	Cardiac contraction	1387285_at	Atp2b2	ATPase, Ca++ transporting, plasma membrane 2	6.66856	0.500116	6.45661	0.356858	0.863371	68.0484	77.2912
Rat	Cardiac contraction	1370602_at	Atp2b4	ATPase, Ca++ transporting, plasma membrane 4	5.98286	0.704271	6.04351	0.509127	1.04294	86.4657	100
Rat	Cardiac contraction	1370444_at	Cacna1b	calcium channel, voltage-dependent, N type, alpha 1B subunit	5.89852	1.40968	6.07591	0.928351	1.13084	86.4657	100
Rat	Cardiac contraction	1370452_at	Cacna1c	calcium channel, voltage-dependent, L type, alpha 1C subunit	9.28275	0.324352	9.25568	0.307176	0.981414	82.0397	95.3658
Rat	Cardiac contraction	1370451_a_at	Cacna1c	calcium channel, voltage-dependent, L type, alpha 1C subunit	7.34139	0.481164	7.36091	0.340487	1.01362	86.4657	100
Rat	Cardiac contraction	1370586_a_at	Cacna1e	calcium channel, voltage-dependent, R type, alpha 1E subunit	5.80022	0.636355	5.18748	1.10716	0.653956	54.2496	62.7217
Rat	Cardiac contraction	1370508_a_at	Cacna1g	calcium channel, voltage-dependent, T type, alpha 1G subunit	5.75447	0.901103	5.70851	1.05982	0.968643	84.4986	96.388
Rat	Cardiac contraction	1369211_at	Cacna1i	calcium channel, voltage-dependent, T type, alpha 1I subunit	7.09453	0.380777	7.07131	0.399966	0.984036	84.4986	96.2981
Rat	Cardiac contraction	1369937_at	Calm1	calmodulin 1	11.6559	0.281683	11.7343	0.354766	1.05582	86.4657	100
Rat	Cardiac contraction	1387772_at	Calm1	calmodulin 1	11.3228	0.164261	11.4711	0.143414	1.10824	85.1408	93.0162
Rat	Cardiac contraction	1369936_at	Calm1	calmodulin 1	11.3076	0.175925	11.3116	0.362884	1.00276	86.4657	99.613
Rat	Cardiac contraction	1370246_at	Calm2	calmodulin 2	11.8006	0.185098	11.8865	0.167459	1.06134	86.4657	100
Rat	Cardiac contraction	1370873_at	Calm3	calmodulin 3	9.96853	0.547362	9.93492	0.407358	0.976975	82.0397	95.6296
Rat	Cardiac contraction	1368101_at	Calm3	calmodulin 3	9.15444	0.348857	9.1037	0.280084	0.965445	82.0397	92.2813
Rat	Cardiac contraction	1398750_at	Calr	calreticulin	11.1151	0.184217	11.1413	0.160981	1.01833	86.4657	100
Rat	Cardiac contraction	1376732_at	Calr3	calreticulin 3	6.62662	0.348576	6.60389	0.300991	0.984366	84.4986	96.0095
Rat	Cardiac contraction	1389824_at	Camk2a	Calcium/calmodulin-dependent protein kinase II alpha	6.22793	0.31693	6.40022	0.402645	1.12684	86.4657	100
Rat	Cardiac contraction	1388187_at	Camk2a	calcium/calmodulin-dependent protein kinase II alpha	6.18402	0.462912	6.17512	0.439714	0.993853	84.4986	98.0948
Rat	Cardiac contraction	1368935_at	Camk2a	calcium/calmodulin-dependent protein kinase II alpha	5.25102	1.2184	5.42024	0.835355	1.12445	86.4657	100
Rat	Cardiac contraction	1375575_at	Camk2b	calcium/calmodulin-dependent protein kinase II beta	6.92909	0.42334	6.93685	0.477422	1.00539	86.4657	99.8584
Rat	Cardiac contraction	1368834_at	Camk2d	calcium/calmodulin-dependent protein kinase II delta	10.9415	0.234239	10.8934	0.281642	0.967157	82.0397	91.805
Rat	Cardiac contraction	1371263_a_at	Camk2d	calcium/calmodulin-dependent protein kinase II delta	8.40233	0.405253	8.32201	0.580739	0.945848	82.0397	91.3184
Rat	Cardiac contraction	1368833_at	Camk2d	calcium/calmodulin-dependent protein kinase II delta	7.35201	0.448817	7.08992	0.351966	0.833877	61.8008	70.7215
Rat	Cardiac contraction	1369993_at	Camk2g	calcium/calmodulin-dependent protein kinase II gamma	8.44337	0.504819	8.39578	0.325806	0.967554	82.0397	93.7889
Rat	Cardiac contraction	1369753_at	Camk4	calcium/calmodulin-dependent protein kinase IV	5.75574	0.531471	5.45073	1.01676	0.809434	70.8252	79.7091
Rat	Cardiac contraction	1388604_at	Casq1	calsequestrin 1 (fast-twitch, skeletal muscle)	9.6678	0.46834	10.0064	0.308806	1.26454	61.8008	74.6986
Rat	Cardiac contraction	1368988_at	Casq2	calsequestrin 2 (cardiac muscle)	13.03	0.185646	13.0716	0.151526	1.02922	86.4657	100
Rat	Cardiac contraction	1371469_at	Chp	calcium binding protein p22	8.90027	0.210734	8.8912	0.224188	0.993739	84.4986	97.5007
Rat	Cardiac contraction	1387388_at	Chp	calcium binding protein p22	8.68183	0.336765	8.80001	0.267731	1.08536	86.4657	100
Rat	Cardiac contraction	1387822_at	Gna11	guanine nucleotide binding protein, alpha 11	7.08181	0.504741	6.81712	0.539642	0.832373	65.0227	75.3072
Rat	Cardiac contraction	1370423_at	Gna15	guanine nucleotide binding protein, alpha 15	7.16731	0.302497	7.10052	0.377422	0.954763	82.0397	90.6972
Rat	Cardiac contraction	1370091_at	Gnaq	guanine nucleotide binding protein, alpha q polypeptide	6.26814	0.759011	6.24793	0.738743	0.986091	84.4986	97.5796
Rat	Cardiac contraction	1369897_s_at	Gnas	GNAS complex locus	13.5003	0.158704	13.4526	0.210116	0.967438	82.0397	90.5206
Rat	Cardiac contraction	1368462_at	Itpka	inositol 1,4,5-trisphosphate 3-kinase A	6.7497	0.457428	6.62672	0.392453	0.918291	70.8252	86.2044
Rat	Cardiac contraction	1369757_at	Itpkb	inositol 1,4,5-trisphosphate 3-kinase B	7.16041	0.621808	6.8468	0.678086	0.804628	65.0227	75.2789
Rat	Cardiac contraction	1387907_at	Itpr1	inositol 1,4,5-triphosphate receptor, type 1	8.58726	0.152608	8.56441	0.263399	0.984287	82.0397	95.1435
Rat	Cardiac contraction	1369676_at	Itpr2	inositol 1,4,5-triphosphate receptor, type 2	8.13597	0.264314	8.08575	0.27606	0.965788	82.0397	91.6947
Rat	Cardiac contraction	1369675_at	Itpr2	inositol 1,4,5-triphosphate receptor, type 2	7.32052	0.332669	7.13826	0.466865	0.881322	70.8252	79.4206
Rat	Cardiac contraction	1368005_at	Itpr3	inositol 1,4,5-triphosphate receptor, type 3	7.00724	0.389599	6.89027	0.341166	0.92212	70.8252	85.5102
Rat	Cardiac contraction	1373697_at	Mybpc2	myosin binding protein C, fast-type	7.57004	0.445275	7.75664	0.439791	1.13808	86.4657	100
Rat	Cardiac contraction	1388597_at	Mybpc3	myosin binding protein C, cardiac	13.3134	0.236401	13.236	0.206873	0.94781	70.8252	86.803
Rat	Cardiac contraction	1388139_at	Myh2	myosin, heavy chain 2, skeletal muscle, adult	5.98384	0.520897	5.93814	0.516123	0.968813	82.0397	94.6568
Rat	Cardiac contraction	1368093_at	Myh6	myosin, heavy chain 6, cardiac muscle, alpha	14.1138	0.283485	14.0197	0.199087	0.936855	70.8252	85.0375
Rat	Cardiac contraction	1387049_at	Myh6	myosin, heavy chain 6, cardiac muscle, alpha	12.6344	0.574946	12.5514	0.576732	0.944091	82.0397	91.8262
Rat	Cardiac contraction	1398248_s_at	Myh6 /// Myh7	myosin, heavy chain 6, cardiac muscle, alpha /// myosin, heavy chain 7, cardiac muscle, beta	14.1054	0.251771	14.016	0.196427	0.939945	70.8252	85.1086
Rat	Cardiac contraction	1386993_at	Myh7	myosin, heavy chain 7, cardiac muscle, beta	14.1233	0.188845	14.0731	0.202514	0.965781	82.0397	90.3254
Rat	Cardiac contraction	1367928_at	Myh7	myosin, heavy chain 7, cardiac muscle, beta	13.118	0.432568	12.9841	0.542086	0.911314	70.8252	86.3944
Rat	Cardiac contraction	1370033_at	Myl1	myosin, light polypeptide 1	6.93133	0.612184	7.20306	0.522679	1.20725	86.3258	100
Rat	Cardiac contraction	1386996_at	Myl12b	myosin, light chain 12B, regulatory	10.7361	0.127507	10.7071	0.154079	0.980063	82.0397	93.003
Rat	Cardiac contraction	1388200_at	Myl2	myosin, light polypeptide 2, regulatory, cardiac, slow	14.1917	0.267726	14.1296	0.234823	0.957821	82.0397	89.7135
Rat	Cardiac contraction	1388293_at	Myl2	myosin, light polypeptide 2, regulatory, cardiac, slow	9.31397	0.580693	9.00156	0.699418	0.805299	65.0227	75.1467
Rat	Cardiac contraction	1367572_at	Myl3	myosin, light chain 3, alkali; ventricular, skeletal, slow	14.0687	0.183595	14.0271	0.174472	0.971606	82.0397	91.4196
Rat	Cardiac contraction	1371304_a_at	Myl6 /// Myl6b /// Myl6l	myosin, light chain 6, alkali, smooth muscle and non-muscle /// myosin, light chain 6B, alkali, smooth muscle and non-muscle /// myosin, light polypeptide 6, alkali, smooth muscle and non-muscle-like	11.9371	0.266436	11.9244	0.3873	0.991231	84.4986	97.3684
Rat	Cardiac contraction	1371541_at	Mylk	myosin light chain kinase	9.87354	0.194376	9.78854	0.205144	0.942783	70.8252	84.8783
Rat	Cardiac contraction	1398820_at	Mylk2	myosin light chain kinase 2	8.08181	0.407447	7.93674	0.38534	0.904335	70.8252	83.2077
Rat	Cardiac contraction	1387787_at	Mylpf	myosin light chain, phosphorylatable, fast skeletal muscle	6.24446	0.700269	6.13641	0.535522	0.927846	82.0397	90.3216
Rat	Cardiac contraction	1374895_at	Myom1	myomesin 1	11.5115	0.299596	11.5198	0.307354	1.00575	86.4657	100
Rat	Cardiac contraction	1388020_a_at	Pde1c	phosphodiesterase 1C	6.7295	0.54742	6.63457	0.422899	0.936319	82.0397	89.8689
Rat	Cardiac contraction	1371014_at	Plcb1	phospholipase C, beta 1 (phosphoinositide-specific)	7.31149	0.260374	7.19568	0.442235	0.922862	70.8252	85.5604
Rat	Cardiac contraction	1388156_at	Plcb3	phospholipase C, beta 3 (phosphatidylinositol-specific)	8.14465	0.359935	7.76256	0.856006	0.767323	61.8008	70.3089
Rat	Cardiac contraction	1386962_at	Plcb4	phospholipase C, beta 4	9.95585	0.179948	9.86267	0.179356	0.937458	70.8252	82.6733
Rat	Cardiac contraction	1370489_a_at	Plcb4	phospholipase C, beta 4	7.05527	0.249557	6.84125	0.301963	0.862133	61.8008	69.439
Rat	Cardiac contraction	1367916_at	Plcd1	phospholipase C, delta 1	9.11972	0.180706	8.94496	0.315717	0.88591	65.0227	73.788
Rat	Cardiac contraction	1389628_at	Plcd3	phospholipase C, delta 3	7.9525	0.232289	8.01917	0.23786	1.04729	86.4657	100
Rat	Cardiac contraction	1368980_at	Plce1	phospholipase C, epsilon 1	7.70532	0.176569	8.03723	0.312387	1.25867	32.8539	52.1562
Rat	Cardiac contraction	1368183_at	Plcg1	phospholipase C, gamma 1	9.74662	0.232248	9.63529	0.1758	0.925734	70.8252	80.8189
Rat	Cardiac contraction	1370157_at	Pln	phospholamban	13.7889	0.194763	13.8464	0.188328	1.04067	86.4657	100
Rat	Cardiac contraction	1371578_at	Prkaca	protein kinase, cAMP-dependent, catalytic, alpha	10.9944	0.494169	10.8324	0.332357	0.893779	70.8252	82.0884
Rat	Cardiac contraction	1370746_at	Prkacb	protein kinase, cAMP dependent, catalytic, beta	6.91584	0.932767	6.89849	0.695994	0.988046	84.4986	97.8806
Rat	Cardiac contraction	1372176_at	Prkca	protein kinase C, alpha	7.37718	0.265487	7.39112	0.200743	1.00971	86.4657	100
Rat	Cardiac contraction	1370585_a_at	Prkcb	protein kinase C, beta	7.11723	0.272748	7.06741	0.297713	0.966059	82.0397	91.9778
Rat	Cardiac contraction	1369089_at	Prkcg	protein kinase C, gamma	6.34696	0.42538	6.28871	0.276432	0.960431	82.0397	91.917
Rat	Cardiac contraction	1388114_at	RGD1309537	similar to Myosin regulatory light chain 2-A, smooth muscle isoform (Myosin RLC-A)	12.4373	0.0894939	12.5222	0.144478	1.06062	86.4657	100
Rat	Cardiac contraction	1382775_at	Ryr2	ryanodine receptor 2, cardiac	8.62996	0.617218	8.91151	0.627433	1.2155	86.4657	100
Rat	Cardiac contraction	1388112_at	Slc25a4	solute carrier family 25 (mitochondrial carrier; adenine nucleotide translocator), member 4	14.205	0.244045	14.1674	0.204598	0.974296	82.0397	92.8699
Rat	Cardiac contraction	1388163_at	Slc25a5	solute carrier family 25 (mitochondrial carrier; adenine nucleotide translocator), member 5	12.383	0.166213	12.4956	0.141847	1.0812	86.4657	100
Rat	Cardiac contraction	1370588_a_at	Slc8a1	solute carrier family 8 (sodium/calcium exchanger), member 1	6.83271	1.07944	6.945	1.27006	1.08094	86.4657	100
Rat	Cardiac contraction	1387564_at	Slc8a2	solute carrier family 8 (sodium/calcium exchanger), member 2	7.00249	0.367016	6.97172	0.321672	0.978897	82.0397	95.1005
Rat	Cardiac contraction	1387404_at	Slc8a3	solute carrier family 8 (sodium/calcium exchanger), member 3	6.50554	0.467346	6.25125	0.557395	0.838403	65.0227	75.9687
Rat	Cardiac contraction	1371354_at	Tnnc1	troponin C type 1 (slow)	14.0826	0.189958	14.0856	0.184951	1.0021	86.4657	99.5923
Rat	Cardiac contraction	1386873_at	Tnni1	troponin I type 1 (skeletal, slow)	7.32607	0.349701	6.9782	0.524599	0.785744	55.8888	63.3599
Rat	Cardiac contraction	1371339_at	Tnni1	troponin I type 1 (skeletal, slow)	7.31245	0.506195	7.11253	0.448486	0.870598	70.8252	79.9227
Rat	Cardiac contraction	1367964_at	Tnni2	troponin I type 2 (skeletal, fast)	6.64483	0.552179	6.73294	0.42118	1.06297	86.4657	100
Rat	Cardiac contraction	1386931_at	Tnni3	troponin I type 3 (cardiac)	14.119	0.187903	14.0748	0.13407	0.969812	82.0397	90.6105
Rat	Cardiac contraction	1367592_at	Tnnt2	troponin T type 2 (cardiac)	14.1643	0.250583	14.0692	0.281495	0.936184	70.8252	85.5552
Rat	Cardiac contraction	1390061_at	Tnnt2	Troponin T type 2 (cardiac)	6.29779	0.396723	6.08819	0.620174	0.864774	70.8252	80.22
Rat	Cardiac contraction	1371247_at	Tnnt3	troponin T type 3 (skeletal, fast)	5.60573	0.481797	4.91604	0.973621	0.619986	45.5483	50.3278
Rat	Cardiac contraction	1368724_a_at	Tpm1	tropomyosin 1, alpha	13.9621	0.163244	13.954	0.123174	0.994435	84.4986	97.3606
Rat	Cardiac contraction	1370288_a_at	Tpm1	tropomyosin 1, alpha	13.8075	0.211087	13.8042	0.260102	0.997763	84.4986	98.5206
Rat	Cardiac contraction	1371241_x_at	Tpm1	Tropomyosin 1, alpha	13.7372	0.174222	13.742	0.226204	1.00329	86.4657	99.87
Rat	Cardiac contraction	1370287_a_at	Tpm1	tropomyosin 1, alpha	8.3398	0.410955	8.47902	0.652586	1.10131	86.4657	100
Rat	Cardiac contraction	1371240_at	Tpm1	Tropomyosin 1, alpha	6.35462	0.860028	5.99286	0.975774	0.778214	68.0484	78.3649
Rat	Cardiac contraction	1371653_at	Tpm4	Tropomyosin 4	10.6763	0.41934	10.7886	0.529984	1.08094	86.4657	100
Rat	Cardiac contraction	1368838_at	Tpm4	tropomyosin 4	9.86935	0.408221	9.91257	0.616324	1.03041	86.4657	100
Mouse	Energy production	1456011_x_at	Acaa1a	acetyl-Coenzyme A acyltransferase 1A	2.30788	0.480675	1.99345	0.546321	0.804168	3	20.5998
Mouse	Energy production	1424451_at	Acaa1b	acetyl-Coenzyme A acyltransferase 1B	-1.16407	0.619245	0.0901385	1.70534	2.38536	0	0
Mouse	Energy production	1428145_at	Acaa2	acetyl-Coenzyme A acyltransferase 2 (mitochondrial 3-oxoacyl-Coenzyme A thiolase)	8.50637	0.462572	8.17129	0.379639	0.792739	2	11.4622
Mouse	Energy production	1448987_at	Acadl	acyl-Coenzyme A dehydrogenase, long-chain	9.76273	0.456166	9.57336	0.400092	0.876985	10	38.7095
Mouse	Energy production	1415984_at	Acadm	acyl-Coenzyme A dehydrogenase, medium chain	9.40088	0.505824	9.35708	0.459783	0.970097	27	71.1168
Mouse	Energy production	1460216_at	Acads	acyl-Coenzyme A dehydrogenase, short chain	5.88149	0.497755	5.62056	0.450889	0.834552	6	26.9254
Mouse	Energy production	1455446_x_at	Acadsb	acyl-Coenzyme A dehydrogenase, short/branched chain	5.58239	0.355058	5.34093	0.508942	0.845889	6	28.5344
Mouse	Energy production	1424184_at	Acadvl	acyl-Coenzyme A dehydrogenase, very long chain	8.85772	0.473149	8.66783	0.441373	0.876674	10	40.3767
Mouse	Energy production	1424183_at	Acat1	acetyl-Coenzyme A acetyltransferase 1	8.28953	0.517056	7.94761	0.366599	0.788988	2	12.0822
Mouse	Energy production	1435630_s_at	Acat2	acetyl-Coenzyme A acetyltransferase 2	3.01268	0.551861	2.61584	0.618276	0.759517	2	13.7875
Mouse	Energy production	1451666_at	Acly	ATP citrate lyase	5.14138	0.521268	5.76019	0.757387	1.53561	0	5.62875
Mouse	Energy production	1456728_x_at	Aco1	aconitase 1	4.9309	0.741591	4.74533	0.614543	0.879302	17	51.2804
Mouse	Energy production	1451002_at	Aco2	aconitase 2, mitochondrial	9.90504	0.50711	10.0705	0.407567	1.12149	28	66.5474
Mouse	Energy production	1416408_at	Acox1	acyl-Coenzyme A oxidase 1, palmitoyl	6.67405	0.461279	6.42006	0.447052	0.838573	6	26.8814
Mouse	Energy production	1420684_at	Acox3	acyl-Coenzyme A oxidase 3, pristanoyl	-0.0356824	0.948833	0.667609	0.741138	1.62821	0	8.78828
Mouse	Energy production	1423883_at	Acsl1	acyl-CoA synthetase long-chain family member 1	9.41317	0.428364	9.1173	0.465769	0.814584	3	19.0707
Mouse	Energy production	1452771_s_at	Acsl3	acyl-CoA synthetase long-chain family member 3	0.836102	0.653789	1.08228	0.60759	1.18606	24	59.8349
Mouse	Energy production	1433531_at	Acsl4	acyl-CoA synthetase long-chain family member 4	3.49559	0.643315	3.38156	0.425368	0.924006	24	59.937
Mouse	Energy production	1428082_at	Acsl5	acyl-CoA synthetase long-chain family member 5	3.84053	0.45809	4.30298	0.476081	1.37788	0	8.56904
Mouse	Energy production	1451257_at	Acsl6	acyl-CoA synthetase long-chain family member 6	2.94414	0.619118	2.84713	0.450518	0.934972	24	63.022
Mouse	Energy production	1416617_at	Acss1	acyl-CoA synthetase short-chain family member 1	7.56	0.526263	7.21628	0.33555	0.788009	1	11.3594
Mouse	Energy production	1422479_at	Acss2	acyl-CoA synthetase short-chain family member 2	4.26577	0.509316	4.13038	0.444676	0.910423	17	53.4524
Mouse	Energy production	1416225_at	Adh1	alcohol dehydrogenase 1 (class I)	3.56852	0.527791	3.22806	0.700727	0.789786	3	23.1556
Mouse	Energy production	1416185_a_at	Adh5	alcohol dehydrogenase 5 (class III), chi polypeptide	6.79936	0.490029	6.5174	0.285948	0.822474	3	17.6822
Mouse	Energy production	1450110_at	Adh7	alcohol dehydrogenase 7 (class IV), mu or sigma polypeptide	-0.632011	0.639256	-0.653093	0.835237	0.985494	27	74.8354
Mouse	Energy production	1437848_x_at	Adpgk	ADP-dependent glucokinase	1.79007	0.819881	1.48809	0.883603	0.811137	10	39.5881
Mouse	Energy production	1430123_a_at	Akr1a4	aldo-keto reductase family 1, member A4 (aldehyde reductase)	9.09221	0.410187	9.0069	0.431493	0.942581	24	62.4737
Mouse	Energy production	1417642_at	Aldh1a3	aldehyde dehydrogenase family 1, subfamily A3	-0.702497	0.540559	-0.45924	0.871933	1.18366	28	64.636
Mouse	Energy production	1451260_at	Aldh1b1	aldehyde dehydrogenase 1 family, member B1	2.62457	0.431052	2.995	0.494698	1.29274	1	22.2296
Mouse	Energy production	1448143_at	Aldh2	aldehyde dehydrogenase 2, mitochondrial	7.50271	0.275027	7.05196	0.257079	0.731664	0	0
Mouse	Energy production	1418752_at	Aldh3a1	aldehyde dehydrogenase family 3, subfamily A1	-1.28296	0.465124	-0.868876	0.851867	1.33245	3	33.8316
Mouse	Energy production	1415776_at	Aldh3a2	aldehyde dehydrogenase family 3, subfamily A2	2.82682	0.350946	2.91776	0.40758	1.06507	35	75.9436
Mouse	Energy production	1452301_at	Aldh3b1	aldehyde dehydrogenase 3 family, member B1	-0.444896	0.649105	-0.344014	0.740979	1.07243	37	77.9391
Mouse	Energy production	1456317_at	Aldh3b2	aldehyde dehydrogenase 3 family, member B2	0.660087	0.566142	0.322646	0.738234	0.791444	6	25.6381
Mouse	Energy production	1460167_at	Aldh7a1	aldehyde dehydrogenase family 7, member A1	4.12961	0.467	4.08512	0.506492	0.96963	27	71.065
Mouse	Energy production	1436689_a_at	Aldh9a1	aldehyde dehydrogenase 9, subfamily A1	5.26217	0.439762	4.66194	0.370995	0.659648	0	0
Mouse	Energy production	1434799_x_at	Aldoa	aldolase A, fructose-bisphosphate	9.70652	0.51579	9.95587	0.360034	1.18867	10	46.5847
Mouse	Energy production	1451194_at	Aldob	aldolase B, fructose-bisphosphate	1.03147	0.971665	-0.267626	1.04911	0.406382	0	0
Mouse	Energy production	1424714_at	Aldoc	aldolase C, fructose-bisphosphate	-1.08262	0.529555	-1.34467	0.409064	0.833903	6	26.4832
Mouse	Energy production	1449475_at	Atp12a	ATPase, H+/K+ transporting, nongastric, alpha polypeptide	-1.22317	0.492248	-1.3074	0.448403	0.943282	24	63.8948
Mouse	Energy production	1448911_at	Atp4b	ATPase, H+/K+ exchanging, beta polypeptide	0.48115	0.961335	0.241628	0.839759	0.847026	17	49.9362
Mouse	Energy production	1449710_s_at	Atp5a1	ATP synthase, H+ transporting, mitochondrial F1 complex, alpha subunit 1	10.1118	0.435543	10.2604	0.419591	1.10846	30	68.4304
Mouse	Energy production	1416829_at	Atp5b	ATP synthase, H+ transporting mitochondrial F1 complex, beta subunit	10.0673	0.516791	10.2681	0.414741	1.14934	24	59.7446
Mouse	Energy production	1416058_s_at	Atp5c1	ATP synthase, H+ transporting, mitochondrial F1 complex, gamma polypeptide 1	10.139	0.466693	10.1223	0.483535	0.988494	27	74.6805
Mouse	Energy production	1456580_s_at	Atp5d	ATP synthase, H+ transporting, mitochondrial F1 complex, delta subunit	8.72724	0.512831	8.75971	0.513168	1.02276	37	78.2687
Mouse	Energy production	1416567_s_at	Atp5e	ATP synthase, H+ transporting, mitochondrial F1 complex, epsilon subunit	8.92663	0.587748	8.60477	0.449219	0.800042	3	19.7025
Mouse	Energy production	1433562_s_at	Atp5f1	ATP synthase, H+ transporting, mitochondrial F0 complex, subunit B1	9.95016	0.362837	10.0469	0.450007	1.06938	35	75.7679
Mouse	Energy production	1416020_a_at	Atp5g1	ATP synthase, H+ transporting, mitochondrial F0 complex, subunit c1 (subunit 9)	9.88496	0.485158	10.0731	0.437238	1.13931	27	62.1311
Mouse	Energy production	1415980_at	Atp5g2	ATP synthase, H+ transporting, mitochondrial F0 complex, subunit C2 (subunit 9)	8.31931	0.566487	8.39632	0.343311	1.05483	37	77.8799
Mouse	Energy production	1454661_at	Atp5g3	ATP synthase, H+ transporting, mitochondrial F0 complex, subunit C3 (subunit 9)	10.0997	0.474785	10.2956	0.441373	1.14542	27	60.3004
Mouse	Energy production	1435112_a_at	Atp5h	ATP synthase, H+ transporting, mitochondrial F0 complex, subunit d	10.4755	0.334656	10.4997	0.376074	1.01692	37	78.1974
Mouse	Energy production	1416143_at	Atp5j	ATP synthase, H+ transporting, mitochondrial F0 complex, subunit F	9.43181	0.534595	9.40571	0.361202	0.982077	27	73.4286
Mouse	Energy production	1416269_at	Atp5j2	ATP synthase, H+ transporting, mitochondrial F0 complex, subunit F2	9.85467	0.439772	9.89473	0.394198	1.02816	37	78.5677
Mouse	Energy production	1434053_x_at	Atp5k	ATP synthase, H+ transporting, mitochondrial F1F0 complex, subunit e	9.31029	0.393086	9.0189	0.409606	0.81711	2	16.5094
Mouse	Energy production	1416278_a_at	Atp5o	ATP synthase, H+ transporting, mitochondrial F1 complex, O subunit	9.62482	0.402561	9.4593	0.395691	0.891605	10	42.5184
Mouse	Energy production	1449622_s_at	Atp6ap1	ATPase, H+ transporting, lysosomal accessory protein 1	6.29091	0.557283	6.40227	0.564362	1.08024	35	76.386
Mouse	Energy production	1417632_at	Atp6v0a1	ATPase, H+ transporting, lysosomal V0 subunit A1	3.934	0.530261	4.13828	0.403162	1.15211	24	59.1074
Mouse	Energy production	1434791_at	Atp6v0a2	ATPase, H+ transporting, lysosomal V0 subunit A2	4.27009	0.494404	4.1291	0.276722	0.906898	17	48.3569
Mouse	Energy production	1437013_x_at	Atp6v0b	ATPase, H+ transporting, lysosomal V0 subunit B	5.53252	0.631814	5.96475	0.469813	1.34932	0	19.5635
Mouse	Energy production	1435732_x_at	Atp6v0c	ATPase, H+ transporting, lysosomal V0 subunit C	8.70143	0.341597	8.98425	0.442489	1.21656	3	34.1043
Mouse	Energy production	1415671_at	Atp6v0d1	ATPase, H+ transporting, lysosomal V0 subunit D1	5.34011	0.432995	5.44053	0.370903	1.07209	33	75.1933
Mouse	Energy production	1416328_a_at	Atp6v0e	ATPase, H+ transporting, lysosomal V0 subunit E	5.24964	0.479225	5.50403	0.441849	1.19283	10	47.0028
Mouse	Energy production	1448211_at	Atp6v0e2	ATPase, H+ transporting, lysosomal V0 subunit E2	2.72202	0.668881	3.02297	0.466761	1.23196	10	45.6732
Mouse	Energy production	1422508_at	Atp6v1a	ATPase, H+ transporting, lysosomal V1 subunit A	3.47311	0.438387	3.70393	0.322154	1.1735	10	45.8464
Mouse	Energy production	1415814_at	Atp6v1b2	ATPase, H+ transporting, lysosomal V1 subunit B2	4.54415	0.644093	4.65733	0.357434	1.08161	35	75.6454
Mouse	Energy production	1419545_a_at	Atp6v1c1	ATPase, H+ transporting, lysosomal V1 subunit C1	4.59791	0.573787	4.8354	0.487657	1.17894	24	55.9455
Mouse	Energy production	1416951_a_at	Atp6v1d	ATPase, H+ transporting, lysosomal V1 subunit D	6.66627	0.516615	6.7829	0.512033	1.0842	33	75.3058
Mouse	Energy production	1449712_s_at	Atp6v1e1	ATPase, H+ transporting, lysosomal V1 subunit E1	6.62054	0.45843	6.53162	0.516922	0.940229	24	63.453
Mouse	Energy production	1450552_at	Atp6v1e2	ATPase, H+ transporting, lysosomal V1 subunit E2	0.0492499	0.705757	-0.11762	0.878416	0.890774	17	57.7328
Mouse	Energy production	1423993_at	Atp6v1f	ATPase, H+ transporting, lysosomal V1 subunit F	6.45794	0.450171	6.34905	0.395524	0.927299	17	57.2653
Mouse	Energy production	1423256_a_at	Atp6v1g1	ATPase, H+ transporting, lysosomal V1 subunit G1	7.35929	0.554077	7.26829	0.574073	0.938875	24	64.6336
Mouse	Energy production	1417799_at	Atp6v1g2	ATPase, H+ transporting, lysosomal V1 subunit G2	0.722051	0.624164	0.769775	0.570864	1.03363	37	78.5285
Mouse	Energy production	1415826_at	Atp6v1h	ATPase, H+ transporting, lysosomal V1 subunit H	3.53683	0.656809	3.83603	0.415476	1.23046	6	43.8771
Mouse	Energy production	1415865_s_at	Bpgm	2,3-bisphosphoglycerate mutase	4.58798	0.873297	5.14988	0.83754	1.47621	1	23.4156
Mouse	Energy production	1435380_at	Cox10	COX10 homolog, cytochrome c oxidase assembly protein, heme A: farnesyltransferase (yeast)	4.26817	0.4906	4.24115	0.319764	0.981443	27	73.0691
Mouse	Energy production	1429188_at	Cox11	COX11 homolog, cytochrome c oxidase assembly protein (yeast)	4.51507	0.453613	4.24925	0.384919	0.831725	3	22.1907
Mouse	Energy production	1426693_x_at	Cox15	COX15 homolog, cytochrome c oxidase assembly protein (yeast)	4.48654	0.64636	4.24074	0.553743	0.843351	10	37.1821
Mouse	Energy production	1434435_s_at	Cox17	cytochrome c oxidase, subunit XVII assembly protein homolog (yeast)	8.27047	0.42825	8.43629	0.276975	1.12181	27	60.8743
Mouse	Energy production	1448322_a_at	Cox4i1	cytochrome c oxidase subunit IV isoform 1	10.2407	0.475962	10.4694	0.432498	1.17174	17	52.5752
Mouse	Energy production	1421373_at	Cox4i2	cytochrome c oxidase subunit IV isoform 2	-0.160907	0.737702	0.351318	0.865669	1.42625	2	26.8042
Mouse	Energy production	1448153_at	Cox5a	cytochrome c oxidase, subunit Va	9.91862	0.410083	9.95154	0.331231	1.02308	37	78.4818
Mouse	Energy production	1456588_x_at	Cox5b	cytochrome c oxidase, subunit Vb	10.1684	0.477905	10.1063	0.438098	0.957847	27	67.799
Mouse	Energy production	1417417_a_at	Cox6a1	cytochrome c oxidase, subunit VI a, polypeptide 1	8.4293	0.507626	8.62458	0.399537	1.14495	27	60.2266
Mouse	Energy production	1417607_at	Cox6a2	cytochrome c oxidase, subunit VI a, polypeptide 2	9.74795	0.564044	9.6553	0.484705	0.937799	24	63.5172
Mouse	Energy production	1436757_a_at	Cox6b1	cytochrome c oxidase, subunit VIb polypeptide 1	10.5239	0.396157	10.5961	0.400641	1.05137	37	77.7461
Mouse	Energy production	1435275_at	Cox6b2	cytochrome c oxidase subunit VIb polypeptide 2	1.00663	0.75745	0.564746	1.03762	0.73617	3	24.4181
Mouse	Energy production	1415970_at	Cox6c	cytochrome c oxidase, subunit VIc	9.64099	0.485165	9.83629	0.417633	1.14496	27	60.0298
Mouse	Energy production	1418709_at	Cox7a1	cytochrome c oxidase, subunit VIIa 1	9.84089	0.461189	9.85996	0.460755	1.01331	37	77.7579
Mouse	Energy production	1416970_a_at	Cox7a2	cytochrome c oxidase, subunit VIIa 2	9.80942	0.383296	9.73777	0.417509	0.951554	27	64.8795
Mouse	Energy production	1432264_x_at	Cox7a2l	cytochrome c oxidase subunit VIIa polypeptide 2-like	7.26727	0.451194	7.18323	0.415523	0.943413	24	63.0438
Mouse	Energy production	1448112_at	Cox7c	cytochrome c oxidase, subunit VIIc	8.56091	0.629902	8.58292	0.48278	1.01537	37	77.7746
Mouse	Energy production	1416112_at	Cox8a	cytochrome c oxidase, subunit VIIIa	5.0178	0.586548	5.20109	0.474675	1.13547	28	66.4115
Mouse	Energy production	1449218_at	Cox8b	cytochrome c oxidase, subunit VIIIb	9.91482	0.547576	9.75986	0.514985	0.898157	17	51.5249
Mouse	Energy production	1455167_at	Cox8c	cytochrome c oxidase, subunit VIIIc	-0.286732	0.725416	0.101911	0.842619	1.30916	10	44.3244
Mouse	Energy production	1460409_at	Cpt1a	carnitine palmitoyltransferase 1a, liver	3.47297	0.493997	3.4305	0.327984	0.970991	27	70.6719
Mouse	Energy production	1435281_at	Cpt1c	carnitine palmitoyltransferase 1c	0.510421	0.713754	1.11415	0.440281	1.51964	0	3.28676
Mouse	Energy production	1416772_at	Cpt2	carnitine palmitoyltransferase 2	7.79896	0.488166	7.32492	0.337148	0.719946	0	0
Mouse	Energy production	1450667_a_at	Cs	citrate synthase	9.91781	0.363706	9.8321	0.47347	0.942326	24	62.4791
Mouse	Energy production	1449400_at	Csl	citrate synthase like	-0.606776	0.549663	-0.76415	0.560981	0.896655	17	52.0212
Mouse	Energy production	1416604_at	Cyc1	cytochrome c-1	9.38233	0.403649	9.48776	0.490748	1.07582	33	75.4815
Mouse	Energy production	1440134_at	Cyp4a31	cytochrome P450, family 4, subfamily a, polypeptide 31	-0.832552	1.276	-1.55904	0.582724	0.604373	0	4.75295
Mouse	Energy production	1418321_at	Dci	dodecenoyl-Coenzyme A delta isomerase (3,2 trans-enoyl-Coenyme A isomerase)	8.15309	0.498743	7.41447	0.392689	0.599313	0	0
Mouse	Energy production	1426264_at	Dlat	dihydrolipoamide S-acetyltransferase (E2 component of pyruvate dehydrogenase complex)	7.12658	0.510716	7.14122	0.346601	1.0102	37	77.531
Mouse	Energy production	1423159_at	Dld	dihydrolipoamide dehydrogenase	7.86633	0.494909	7.83458	0.495888	0.978231	27	72.907
Mouse	Energy production	1423710_at	Dlst	dihydrolipoamide S-succinyltransferase (E2 component of 2-oxo-glutarate complex)	7.71529	0.478605	7.65034	0.299444	0.95598	27	66.1309
Mouse	Energy production	1452341_at	Echs1	enoyl Coenzyme A hydratase, short chain, 1, mitochondrial	7.95164	0.570035	7.91821	0.49652	0.9771	27	72.8969
Mouse	Energy production	1448382_at	Ehhadh	enoyl-Coenzyme A, hydratase/3-hydroxyacyl Coenzyme A dehydrogenase	2.19557	0.570778	2.01955	0.477175	0.88514	17	46.8928
Mouse	Energy production	1418829_a_at	Eno2	enolase 2, gamma neuronal	0.033538	0.892549	0.332504	0.957667	1.23026	27	63.6955
Mouse	Energy production	1417951_at	Eno3	enolase 3, beta muscle	9.63963	0.459738	9.75006	0.440103	1.07955	33	74.8915
Mouse	Energy production	1448470_at	Fbp1	fructose bisphosphatase 1	-1.22082	0.60007	-1.30242	0.793695	0.945013	27	68.1292
Mouse	Energy production	1449088_at	Fbp2	fructose bisphosphatase 2	4.21232	0.885233	2.87486	0.827471	0.395716	0	0
Mouse	Energy production	1424828_a_at	Fh1	fumarate hydratase 1	8.84781	0.447862	8.59614	0.39718	0.839926	6	25.0821
Mouse	Energy production	1452583_s_at	Galm	galactose mutarotase	3.87853	0.540739	3.6673	0.391454	0.8638	10	36.4809
Mouse	Energy production	1449974_at	Gapdhs	glyceraldehyde-3-phosphate dehydrogenase, spermatogenic	-1.35987	0.842646	-1.11691	1.07422	1.18342	31	70.8515
Mouse	Energy production	1448717_at	Gcdh	glutaryl-Coenzyme A dehydrogenase	4.18634	0.584122	3.85106	0.637863	0.792631	3	23.2586
Mouse	Energy production	1425303_at	Gck	glucokinase	1.75208	0.561815	0.90378	0.81751	0.555438	0	0
Mouse	Energy production	1427404_x_at	Gm5506	predicted gene 5506	5.87891	0.427635	6.23589	0.434074	1.28074	1	21.3886
Mouse	Energy production	1434814_x_at	Gpi1	glucose phosphate isomerase 1	8.13143	0.456564	8.0807	0.436717	0.965451	27	69.6308
Mouse	Energy production	1455972_x_at	Hadh	hydroxyacyl-Coenzyme A dehydrogenase	9.93018	0.667255	9.42085	0.801546	0.70255	1	10.1742
Mouse	Energy production	1452173_at	Hadha	hydroxyacyl-Coenzyme A dehydrogenase/3-ketoacyl-Coenzyme A thiolase/enoyl-Coenzyme A hydratase (trifunctional protein), alpha subunit	8.99274	0.598024	8.63317	0.338496	0.779397	2	12.0439
Mouse	Energy production	1426522_at	Hadhb	hydroxyacyl-Coenzyme A dehydrogenase/3-ketoacyl-Coenzyme A thiolase/enoyl-Coenzyme A hydratase (trifunctional protein), beta subunit	9.55086	0.470328	9.38791	0.43499	0.893193	10	46.1619
Mouse	Energy production	1437974_a_at	Hk1	hexokinase 1	6.08316	0.458591	6.66339	0.333936	1.49509	0	0
Mouse	Energy production	1422612_at	Hk2	hexokinase 2	7.42263	0.450967	7.26749	0.413175	0.898045	17	46.8761
Mouse	Energy production	1442798_x_at	Hk3	hexokinase 3	1.3942	0.872797	1.2743	0.638902	0.920252	24	63.6399
Mouse	Energy production	1422433_s_at	Idh1	isocitrate dehydrogenase 1 (NADP+), soluble	5.18992	0.387731	5.00415	0.436901	0.879176	10	38.6709
Mouse	Energy production	1450048_a_at	Idh2	isocitrate dehydrogenase 2 (NADP+), mitochondrial	8.85112	0.54556	8.73641	0.431202	0.923568	17	58.2898
Mouse	Energy production	1432016_a_at	Idh3a	isocitrate dehydrogenase 3 (NAD+) alpha	8.96734	0.491656	9.07529	0.416958	1.0777	33	75.2518
Mouse	Energy production	1418886_s_at	Idh3b	isocitrate dehydrogenase 3 (NAD+) beta	8.71628	0.355141	8.39497	0.394202	0.800344	1	10.2821
Mouse	Energy production	1416789_at	Idh3g	isocitrate dehydrogenase 3 (NAD+), gamma	9.192	0.496086	9.04682	0.445954	0.904265	17	51.0463
Mouse	Energy production	1419737_a_at	Ldha	lactate dehydrogenase A	8.57084	0.492219	9.1752	0.477154	1.52031	0	0
Mouse	Energy production	1434499_a_at	Ldhb	lactate dehydrogenase B	9.74516	0.432939	9.52702	0.3404	0.859674	6	29.4328
Mouse	Energy production	1452889_at	Lhpp	phospholysine phosphohistidine inorganic pyrophosphate phosphatase	3.1647	0.534373	2.68124	0.322682	0.71526	0	0.154674
Mouse	Energy production	1454925_x_at	Mdh1	malate dehydrogenase 1, NAD (soluble)	10.4076	0.438849	10.5267	0.429089	1.08601	32	73.4628
Mouse	Energy production	1433984_a_at	Mdh2	malate dehydrogenase 2, NAD (mitochondrial)	10.2149	0.387039	10.2414	0.404741	1.01856	37	78.229
Mouse	Energy production	1422241_a_at	Ndufa1	NADH dehydrogenase (ubiquinone) 1 alpha subcomplex, 1	9.5827	0.443337	9.66714	0.341867	1.06027	36	76.7626
Mouse	Energy production	1448934_at	Ndufa10	NADH dehydrogenase (ubiquinone) 1 alpha subcomplex 10	8.9848	0.48677	9.19064	0.356421	1.15335	24	55.7467
Mouse	Energy production	1429708_at	Ndufa11	NADH dehydrogenase (ubiquinone) 1 alpha subcomplex 11	8.80087	0.490945	8.78886	0.410247	0.991716	27	75.1542
Mouse	Energy production	1433513_x_at	Ndufa12	NADH dehydrogenase (ubiquinone) 1 alpha subcomplex, 12	9.53363	0.455196	9.41958	0.451343	0.92399	17	57.2245
Mouse	Energy production	1430713_s_at	Ndufa13	NADH dehydrogenase (ubiquinone) 1 alpha subcomplex, 13	9.47827	0.402681	9.11532	0.392467	0.777573	0	6.74021
Mouse	Energy production	1417368_s_at	Ndufa2	NADH dehydrogenase (ubiquinone) 1 alpha subcomplex, 2	8.39497	0.546316	8.34153	0.30011	0.963636	27	69.0151
Mouse	Energy production	1428464_at	Ndufa3	NADH dehydrogenase (ubiquinone) 1 alpha subcomplex, 3	9.9048	0.326811	9.86608	0.352782	0.973517	27	70.4779
Mouse	Energy production	1424085_at	Ndufa4	NADH dehydrogenase (ubiquinone) 1 alpha subcomplex, 4	9.07664	0.629959	9.06891	0.453514	0.994659	27	75.7106
Mouse	Energy production	1434905_at	Ndufa4l2	NADH dehydrogenase (ubiquinone) 1 alpha subcomplex, 4-like 2	2.15934	0.848782	2.94113	0.558	1.71926	0	0
Mouse	Energy production	1417285_a_at	Ndufa5	NADH dehydrogenase (ubiquinone) 1 alpha subcomplex, 5	9.83508	0.399842	9.7578	0.322468	0.947841	24	62.5693
Mouse	Energy production	1448427_at	Ndufa6	NADH dehydrogenase (ubiquinone) 1 alpha subcomplex, 6 (B14)	8.14215	0.50986	8.09043	0.35605	0.964788	27	69.3314
Mouse	Energy production	1450818_a_at	Ndufa7	NADH dehydrogenase (ubiquinone) 1 alpha subcomplex, 7 (B14.5a)	8.37201	0.433394	8.1084	0.460217	0.833002	3	24.639
Mouse	Energy production	1423692_at	Ndufa8	NADH dehydrogenase (ubiquinone) 1 alpha subcomplex, 8	8.55463	0.452415	8.49182	0.41154	0.957399	27	67.2455
Mouse	Energy production	1416663_at	Ndufa9	NADH dehydrogenase (ubiquinone) 1 alpha subcomplex, 9	8.90977	0.449328	8.74981	0.464172	0.895049	17	47.1004
Mouse	Energy production	1428159_s_at	Ndufab1	NADH dehydrogenase (ubiquinone) 1, alpha/beta subcomplex, 1	9.6479	0.394014	9.54315	0.422939	0.929969	17	57.7413
Mouse	Energy production	1428322_a_at	Ndufb10	NADH dehydrogenase (ubiquinone) 1 beta subcomplex, 10	9.58821	0.381894	9.4358	0.362181	0.899746	10	44.0887
Mouse	Energy production	1455911_x_at	Ndufb11	NADH dehydrogenase (ubiquinone) 1 beta subcomplex, 11	9.08583	0.47644	8.91858	0.373835	0.890541	10	43.7131
Mouse	Energy production	1448483_a_at	Ndufb2	NADH dehydrogenase (ubiquinone) 1 beta subcomplex, 2	8.43952	0.480883	8.30014	0.404815	0.907911	17	51.0943
Mouse	Energy production	1416547_at	Ndufb3	NADH dehydrogenase (ubiquinone) 1 beta subcomplex 3	8.51226	0.470271	8.30918	0.455167	0.868693	10	37.8413
Mouse	Energy production	1417102_a_at	Ndufb5	NADH dehydrogenase (ubiquinone) 1 beta subcomplex, 5	9.2213	0.338083	9.06589	0.367714	0.897876	10	42.1633
Mouse	Energy production	1434056_a_at	Ndufb6	NADH dehydrogenase (ubiquinone) 1 beta subcomplex, 6	9.03894	0.508787	8.83869	0.455339	0.870399	10	39.5844
Mouse	Energy production	1416417_a_at	Ndufb7	NADH dehydrogenase (ubiquinone) 1 beta subcomplex, 7	8.68407	0.482507	8.4522	0.455855	0.85153	6	32.2333
Mouse	Energy production	1448198_a_at	Ndufb8	NADH dehydrogenase (ubiquinone) 1 beta subcomplex 8	8.91583	0.40463	8.6096	0.421403	0.808749	2	15.0119
Mouse	Energy production	1436803_a_at	Ndufb9	NADH dehydrogenase (ubiquinone) 1 beta subcomplex, 9	9.69122	0.411077	9.60596	0.376547	0.942615	24	61.6824
Mouse	Energy production	1448284_a_at	Ndufc1	NADH dehydrogenase (ubiquinone) 1, subcomplex unknown, 1	9.33451	0.376285	9.14791	0.376355	0.878675	10	35.8958
Mouse	Energy production	1455036_s_at	Ndufc2	NADH dehydrogenase (ubiquinone) 1, subcomplex unknown, 2	9.11555	0.495542	9.03244	0.448896	0.944021	24	64.1565
Mouse	Energy production	1425143_a_at	Ndufs1	NADH dehydrogenase (ubiquinone) Fe-S protein 1	9.1145	0.460153	8.8173	0.392851	0.813829	3	17.3145
Mouse	Energy production	1451096_at	Ndufs2	NADH dehydrogenase (ubiquinone) Fe-S protein 2	9.10899	0.538725	9.10106	0.401526	0.994521	27	75.6195
Mouse	Energy production	1423737_at	Ndufs3	NADH dehydrogenase (ubiquinone) Fe-S protein 3	8.76928	0.475179	8.7464	0.379	0.984267	27	73.743
Mouse	Energy production	1448959_at	Ndufs4	NADH dehydrogenase (ubiquinone) Fe-S protein 4	7.67365	0.526339	7.21853	0.419952	0.729451	0	2.89973
Mouse	Energy production	1416495_s_at	Ndufs5	NADH dehydrogenase (ubiquinone) Fe-S protein 5	8.857	0.505926	8.82436	0.33926	0.977633	27	72.346
Mouse	Energy production	1433603_at	Ndufs6	NADH dehydrogenase (ubiquinone) Fe-S protein 6	8.85848	0.413324	8.67036	0.283931	0.877748	6	33.6922
Mouse	Energy production	1424313_a_at	Ndufs7	NADH dehydrogenase (ubiquinone) Fe-S protein 7	9.89284	0.429311	9.76316	0.425585	0.914036	17	52.649
Mouse	Energy production	1423907_a_at	Ndufs8	NADH dehydrogenase (ubiquinone) Fe-S protein 8	10.1645	0.302605	10.0716	0.4227	0.937616	24	59.1202
Mouse	Energy production	1456015_x_at	Ndufv1	NADH dehydrogenase (ubiquinone) flavoprotein 1	8.89931	0.532838	8.61485	0.635713	0.821048	6	29.8696
Mouse	Energy production	1428179_at	Ndufv2	NADH dehydrogenase (ubiquinone) flavoprotein 2	9.83288	0.386599	9.71277	0.388735	0.920119	17	53.144
Mouse	Energy production	1424628_a_at	Ndufv3	NADH dehydrogenase (ubiquinone) flavoprotein 3	9.27355	0.524837	9.21799	0.539857	0.962227	27	69.8506
Mouse	Energy production	1451274_at	Ogdh	oxoglutarate dehydrogenase (lipoamide)	9.14757	0.471095	9.0224	0.349062	0.916899	17	53.0128
Mouse	Energy production	1423439_at	Pck1	phosphoenolpyruvate carboxykinase 1, cytosolic	1.94614	1.08291	2.25976	1.46136	1.24283	31	70.3902
Mouse	Energy production	1425615_a_at	Pck2	phosphoenolpyruvate carboxykinase 2 (mitochondrial)	2.06336	0.511044	2.38587	0.497714	1.2505	3	35.5228
Mouse	Energy production	1416383_a_at	Pcx	pyruvate carboxylase	3.19714	0.493845	3.12446	0.638701	0.950874	27	67.7529
Mouse	Energy production	1418560_at	Pdha1	pyruvate dehydrogenase E1 alpha 1	8.98676	0.483234	8.89185	0.389197	0.936331	24	60.8395
Mouse	Energy production	1416090_at	Pdhb	pyruvate dehydrogenase (lipoamide) beta	9.00625	0.402421	8.9453	0.49722	0.958629	27	67.9637
Mouse	Energy production	1431012_a_at	Peci	peroxisomal delta3, delta2-enoyl-Coenzyme A isomerase	6.45361	0.518711	6.00842	0.399166	0.734484	0	2.98904
Mouse	Energy production	1439148_a_at	Pfkl	phosphofructokinase, liver, B-type	5.93436	0.614353	6.5168	0.404331	1.49738	0	1.37419
Mouse	Energy production	1416780_at	Pfkm	phosphofructokinase, muscle	9.07464	0.485066	9.01927	0.350358	0.96235	27	68.4475
Mouse	Energy production	1416069_at	Pfkp	phosphofructokinase, platelet	4.4898	0.502719	4.83026	0.372024	1.26616	1	25.4819
Mouse	Energy production	1426554_a_at	Pgam1	phosphoglycerate mutase 1	5.39646	0.663486	6.09083	0.438129	1.61818	0	0
Mouse	Energy production	1418373_at	Pgam2	phosphoglycerate mutase 2	8.63821	0.556443	8.554	0.385723	0.943304	24	64.0131
Mouse	Energy production	1417864_at	Pgk1	phosphoglycerate kinase 1	7.99915	0.54189	8.25055	0.406585	1.19036	10	49.0006
Mouse	Energy production	1416784_at	Pgk2	phosphoglycerate kinase 2	-1.01935	0.686016	-1.06783	0.714507	0.96695	27	72.0592
Mouse	Energy production	1453283_at	Pgm1	phosphoglucomutase 1	1.53536	0.550644	1.67156	0.401908	1.09901	31	72.179
Mouse	Energy production	1451149_at	Pgm2	phosphoglucomutase 2	6.5828	0.284801	6.37247	0.266217	0.864343	3	21.8318
Mouse	Energy production	1421258_a_at	Pklr	pyruvate kinase liver and red blood cell	-0.372558	0.61841	-0.706743	0.646264	0.793233	3	24.5517
Mouse	Energy production	1417308_at	Pkm2	pyruvate kinase, muscle	8.4055	0.479681	8.73692	0.342414	1.25825	1	24.7209
Mouse	Energy production	1416939_at	Ppa1	pyrophosphatase (inorganic) 1	5.55268	0.386085	5.468	0.381974	0.942989	24	61.5271
Mouse	Energy production	1424488_a_at	Ppa2	pyrophosphatase (inorganic) 2	6.20565	0.48765	5.71677	0.363258	0.712577	0	0
Mouse	Energy production	1416940_at	Ppif	peptidylprolyl isomerase F (cyclophilin F)	7.60463	0.503932	7.10377	0.328635	0.706684	0	0
Mouse	Energy production	1426688_at	Sdha	succinate dehydrogenase complex, subunit A, flavoprotein (Fp)	8.90819	0.459648	8.75702	0.468784	0.900521	17	49.4374
Mouse	Energy production	1418005_at	Sdhb	succinate dehydrogenase complex, subunit B, iron sulfur (Ip)	9.62414	0.500226	9.70489	0.46634	1.05757	37	77.7946
Mouse	Energy production	1448630_a_at	Sdhc	succinate dehydrogenase complex, subunit C, integral membrane protein	8.30647	0.515874	8.55709	0.404128	1.18972	10	47.9534
Mouse	Energy production	1428235_at	Sdhd	succinate dehydrogenase complex, subunit D, integral membrane protein	7.99809	0.522413	8.02695	0.514509	1.02021	37	78.1313
Mouse	Energy production	1452206_at	Sucla2	succinate-Coenzyme A ligase, ADP-forming, beta subunit	9.16172	0.400043	8.95682	0.397654	0.867595	6	33.231
Mouse	Energy production	1415891_at	Suclg1	succinate-CoA ligase, GDP-forming, alpha subunit	8.36902	0.493597	8.25192	0.351296	0.922041	17	55.4787
Mouse	Energy production	1435841_s_at	Suclg2	succinate-Coenzyme A ligase, GDP-forming, beta subunit	7.65848	0.31617	7.51224	0.404038	0.903603	10	45.2509
Mouse	Energy production	1420635_a_at	Tcirg1	T-cell, immune regulator 1, ATPase, H+ transporting, lysosomal V0 protein A3	1.96836	0.564444	2.24475	0.449898	1.21116	10	45.9062
Mouse	Energy production	1452927_x_at	Tpi1	triosephosphate isomerase 1	8.49548	0.523421	8.7961	0.422508	1.23168	3	37.469
Mouse	Energy production	1424364_a_at	Uqcr10	ubiquinol-cytochrome c reductase, complex III subunit X	8.28635	0.643426	8.32318	0.436552	1.02586	37	78.3575
Mouse	Energy production	1448292_at	Uqcr11	ubiquinol-cytochrome c reductase, complex III subunit XI	9.03144	0.512445	8.98457	0.428109	0.968035	27	70.5292
Mouse	Energy production	1455997_a_at	Uqcrb	ubiquinol-cytochrome c reductase binding protein	10.3158	0.47589	10.3791	0.422918	1.04479	37	78.3906
Mouse	Energy production	1428782_a_at	Uqcrc1	ubiquinol-cytochrome c reductase core protein 1	9.12385	0.487098	9.06276	0.385261	0.958535	27	67.6542
Mouse	Energy production	1435757_a_at	Uqcrc2	ubiquinol cytochrome c reductase core protein 2	10.4917	0.319908	10.5349	0.394451	1.03038	37	78.6072
Mouse	Energy production	1450968_at	Uqcrfs1	ubiquinol-cytochrome c reductase, Rieske iron-sulfur polypeptide 1	9.35025	0.496682	9.45895	0.410407	1.07825	33	75.1604
Mouse	Energy production	1453229_s_at	Uqcrh	ubiquinol-cytochrome c reductase hinge protein	9.74658	0.428727	9.73228	0.40737	0.990137	27	74.8118
Mouse	Energy production	1430326_s_at	Uqcrq	ubiquinol-cytochrome c reductase, complex III subunit VII	8.63743	0.413868	8.71912	0.423751	1.05826	36	77.2597
Mouse	Energy production	1437947_x_at	Vdac1	voltage-dependent anion channel 1	9.18623	0.33117	9.04025	0.43735	0.903761	17	46.8255
Mouse	Energy production	1415990_at	Vdac2	voltage-dependent anion channel 2	8.67477	0.548068	8.80892	0.474022	1.09745	32	73.2414
Mouse	Energy production	1416175_a_at	Vdac3	voltage-dependent anion channel 3	8.57714	0.425806	8.49696	0.493027	0.945941	24	64.516
Mouse	Cardiac contraction	1420809_a_at	1500003O03Rik	RIKEN cDNA 1500003O03 gene	4.59189	0.668244	4.81929	0.534923	1.17072	27	61.8028
Mouse	Cardiac contraction	1415927_at	Actc1	actin, alpha, cardiac muscle 1	10.6756	0.418101	10.995	0.421859	1.24784	2	27.9796
Mouse	Cardiac contraction	1456487_at	Adcy1	adenylate cyclase 1	2.25594	0.545485	2.01184	0.590665	0.844346	10	35.8921
Mouse	Cardiac contraction	1455462_at	Adcy2	adenylate cyclase 2	-0.229278	0.991318	-0.284206	0.777822	0.962642	27	72.3285
Mouse	Cardiac contraction	1421960_at	Adcy3	adenylate cyclase 3	1.35329	0.577383	2.01575	0.485428	1.58277	0	0
Mouse	Cardiac contraction	1418098_at	Adcy4	adenylate cyclase 4	2.69344	0.399281	3.07188	0.423498	1.29993	0	15.6526
Mouse	Cardiac contraction	1456307_s_at	Adcy7	adenylate cyclase 7	3.15321	0.622544	3.61832	0.464015	1.38043	0	14.1827
Mouse	Cardiac contraction	1418754_at	Adcy8	adenylate cyclase 8	-0.953956	0.593045	-0.861126	0.643242	1.06646	37	77.9255
Mouse	Cardiac contraction	1419811_at	Adcy9	adenylate cyclase 9	4.17331	0.437204	4.22531	0.368357	1.0367	37	78.556
Mouse	Cardiac contraction	1451071_a_at	Atp1a1	ATPase, Na+/K+ transporting, alpha 1 polypeptide	7.37059	0.869919	8.04806	0.446087	1.59934	0	2.98084
Mouse	Cardiac contraction	1443823_s_at	Atp1a2	ATPase, Na+/K+ transporting, alpha 2 polypeptide	7.52401	0.658632	7.10327	0.692925	0.747043	2	15.7621
Mouse	Cardiac contraction	1437321_at	Atp1a4	ATPase, Na+/K+ transporting, alpha 4 polypeptide	-0.761845	0.557026	-0.660351	0.761377	1.07288	37	77.7972
Mouse	Cardiac contraction	1439036_a_at	Atp1b1	ATPase, Na+/K+ transporting, beta 1 polypeptide	8.39243	0.634131	8.55259	0.32503	1.11741	30	69.0359
Mouse	Cardiac contraction	1435148_at	Atp1b2	ATPase, Na+/K+ transporting, beta 2 polypeptide	2.62357	0.395427	2.83358	0.254462	1.1567	10	46.3034
Mouse	Cardiac contraction	1423126_at	Atp1b3	ATPase, Na+/K+ transporting, beta 3 polypeptide	5.79634	0.463867	6.09884	0.386837	1.23328	3	32.3258
Mouse	Cardiac contraction	1419312_at	Atp2a1	ATPase, Ca++ transporting, cardiac muscle, fast twitch 1	-0.0391372	0.691655	-0.496231	0.758353	0.728452	2	14.3741
Mouse	Cardiac contraction	1416551_at	Atp2a2	ATPase, Ca++ transporting, cardiac muscle, slow twitch 2	10.7203	0.493603	10.9122	0.419226	1.14226	27	61.0793
Mouse	Cardiac contraction	1421129_a_at	Atp2a3	ATPase, Ca++ transporting, ubiquitous	1.64927	0.430984	1.91274	0.675093	1.20036	17	53.2899
Mouse	Cardiac contraction	1428937_at	Atp2b1	ATPase, Ca++ transporting, plasma membrane 1	3.67007	0.588214	4.12592	0.361253	1.37159	0	10.5153
Mouse	Cardiac contraction	1433888_at	Atp2b2	ATPase, Ca++ transporting, plasma membrane 2	-0.459347	0.694612	-0.745299	0.784452	0.8202	10	37.3771
Mouse	Cardiac contraction	1442645_at	Atp2b3	ATPase, Ca++ transporting, plasma membrane 3	-0.89192	0.715774	-1.34542	0.8616	0.730269	3	17.9125
Mouse	Cardiac contraction	1445701_at	Atp2b4	ATPase, Ca++ transporting, plasma membrane 4	-0.60168	0.476328	-0.583645	0.617785	1.01258	37	77.5734
Mouse	Cardiac contraction	1430408_at	Cacna1a	calcium channel, voltage-dependent, P/Q type, alpha 1A subunit	-0.259213	0.645583	-0.234992	1.16293	1.01693	37	77.4728
Mouse	Cardiac contraction	1439612_at	Cacna1b	calcium channel, voltage-dependent, N type, alpha 1B subunit	-0.670939	0.485617	-1.05397	0.621469	0.766825	2	13.9289
Mouse	Cardiac contraction	1421297_a_at	Cacna1c	calcium channel, voltage-dependent, L type, alpha 1C subunit	6.01882	0.592776	6.02496	0.396431	1.00427	37	76.8616
Mouse	Cardiac contraction	1427974_s_at	Cacna1d	calcium channel, voltage-dependent, L type, alpha 1D subunit	0.0379947	0.571656	-0.366282	0.580635	0.755615	2	12.3433
Mouse	Cardiac contraction	1423365_at	Cacna1g	calcium channel, voltage-dependent, T type, alpha 1G subunit	1.94918	1.1301	1.61837	0.681959	0.795089	10	38.2759
Mouse	Cardiac contraction	1422710_a_at	Cacna1h	calcium channel, voltage-dependent, T type, alpha 1H subunit	1.62317	1.58223	1.57882	1.82971	0.96973	27	74.7165
Mouse	Cardiac contraction	1420442_at	Cacna1s	calcium channel, voltage-dependent, L type, alpha 1S subunit	1.28156	0.560881	0.559538	0.636399	0.606248	0	0
Mouse	Cardiac contraction	1433643_at	Cacna2d1	calcium channel, voltage-dependent, alpha2/delta subunit 1	6.25672	0.62436	5.83438	0.650184	0.746217	2	13.6114
Mouse	Cardiac contraction	1450754_at	Cacna2d2	calcium channel, voltage-dependent, alpha 2/delta subunit 2	1.79044	0.633115	1.59797	0.627184	0.875107	17	48.2868
Mouse	Cardiac contraction	1419225_at	Cacna2d3	calcium channel, voltage-dependent, alpha2/delta subunit 3	-1.10596	0.545397	-1.33233	0.552809	0.854782	10	38.1162
Mouse	Cardiac contraction	1441084_at	Cacna2d4	calcium channel, voltage-dependent, alpha 2/delta subunit 4	-0.0251553	0.706181	0.320967	0.801834	1.27114	10	49.4627
Mouse	Cardiac contraction	1426108_s_at	Cacnb1	calcium channel, voltage-dependent, beta 1 subunit	0.389809	1.04293	0.442675	0.7155	1.03732	37	78.362
Mouse	Cardiac contraction	1456401_at	Cacnb2	calcium channel, voltage-dependent, beta 2 subunit	5.0167	0.680689	5.11704	0.436183	1.07203	36	77.2128
Mouse	Cardiac contraction	1448656_at	Cacnb3	calcium channel, voltage-dependent, beta 3 subunit	-0.268852	0.7153	0.593808	0.839347	1.81839	0	0
Mouse	Cardiac contraction	1436912_at	Cacnb4	calcium channel, voltage-dependent, beta 4 subunit	-0.465339	0.51492	-0.989728	0.427117	0.695253	0	0
Mouse	Cardiac contraction	1453363_at	Cacng2	calcium channel, voltage-dependent, gamma subunit 2	0.587961	0.56403	0.651804	0.755012	1.04525	37	78.6081
Mouse	Cardiac contraction	1455230_at	Cacng4	calcium channel, voltage-dependent, gamma subunit 4	-0.633051	0.695941	-1.06279	0.639965	0.742395	2	14.2942
Mouse	Cardiac contraction	1451811_at	Cacng6	calcium channel, voltage-dependent, gamma subunit 6	-0.0603961	0.639082	-0.25469	0.618345	0.874001	17	47.8864
Mouse	Cardiac contraction	1439745_at	Cacng7	calcium channel, voltage-dependent, gamma subunit 7	0.958768	1.41392	0.299112	1.41526	0.633029	3	22.2675
Mouse	Cardiac contraction	1455571_x_at	Calm1	calmodulin 1	7.48357	0.606889	7.79745	0.415857	1.24305	6	38.4005
Mouse	Cardiac contraction	1423807_a_at	Calm2	calmodulin 2	7.78179	0.469249	8.31438	0.419131	1.44653	0	1.10858
Mouse	Cardiac contraction	1426710_at	Calm3	calmodulin 3	4.55401	1.1588	5.49866	0.524859	1.92472	0	0
Mouse	Cardiac contraction	1457311_at	Camk2a	calcium/calmodulin-dependent protein kinase II alpha	2.18655	0.692534	2.1735	0.591948	0.990991	27	75.3461
Mouse	Cardiac contraction	1448676_at	Camk2b	calcium/calmodulin-dependent protein kinase II, beta	1.57431	0.564478	1.5131	0.58831	0.958456	27	69.4909
Mouse	Cardiac contraction	1422659_at	Camk2d	calcium/calmodulin-dependent protein kinase II, delta	5.03092	0.676996	4.76629	0.423233	0.832412	6	31.5533
Mouse	Cardiac contraction	1423942_a_at	Camk2g	calcium/calmodulin-dependent protein kinase II gamma	4.18793	0.548107	3.88823	0.36113	0.81242	3	19.2292
Mouse	Cardiac contraction	1452572_at	Camk4	calcium/calmodulin-dependent protein kinase IV	-0.825234	0.882322	-0.656787	0.891927	1.12385	35	75.6394
Mouse	Cardiac contraction	1456601_x_at	Fxyd2	FXYD domain-containing ion transport regulator 2	1.08536	0.530685	1.52686	0.676827	1.35801	1	22.9234
Mouse	Cardiac contraction	1449144_at	Gna11	guanine nucleotide binding protein, alpha 11	4.41548	0.623556	4.72798	0.703844	1.24186	10	49.9038
Mouse	Cardiac contraction	1442021_at	Gnal	guanine nucleotide binding protein, alpha stimulating, olfactory type	-0.420233	0.821434	-0.758181	0.742306	0.791166	6	31.4614
Mouse	Cardiac contraction	1455729_at	Gnaq	guanine nucleotide binding protein, alpha q polypeptide	3.89138	0.525177	3.90317	0.410612	1.00821	37	77.2952
Mouse	Cardiac contraction	1450186_s_at	Gnas	GNAS (guanine nucleotide binding protein, alpha stimulating) complex locus	9.32985	0.460101	9.48095	0.284662	1.11041	28	65.6441
Mouse	Cardiac contraction	1424037_at	Itpka	inositol 1,4,5-trisphosphate 3-kinase A	-0.768153	0.530157	-0.990406	0.607594	0.857225	10	40.1009
Mouse	Cardiac contraction	1435272_at	Itpkb	inositol 1,4,5-trisphosphate 3-kinase B	4.34683	0.425609	4.63148	0.360111	1.21812	3	33.12
Mouse	Cardiac contraction	1454755_at	Itpkc	inositol 1,4,5-trisphosphate 3-kinase C	1.4963	0.351099	1.52439	0.422244	1.01966	37	78.3015
Mouse	Cardiac contraction	1417279_at	Itpr1	inositol 1,4,5-triphosphate receptor 1	3.33909	0.554943	3.62382	0.460869	1.21818	6	44.0747
Mouse	Cardiac contraction	1424834_s_at	Itpr2	inositol 1,4,5-triphosphate receptor 2	2.58466	0.729356	2.65475	0.593272	1.04978	37	78.5799
Mouse	Cardiac contraction	1417297_at	Itpr3	inositol 1,4,5-triphosphate receptor 3	0.609957	0.825466	1.11478	0.687526	1.41895	1	24.382
Mouse	Cardiac contraction	1448826_at	Myh6	myosin, heavy polypeptide 6, cardiac muscle, alpha	11.64	0.391393	11.8942	0.399895	1.19267	6	41.1131
Mouse	Cardiac contraction	1448554_s_at	Myh6 /// Myh7	myosin, heavy polypeptide 6, cardiac muscle, alpha /// myosin, heavy polypeptide 7, cardiac muscle, beta	10.84	0.49	10.95	0.37	1.07513	33	75.236
Mouse	Cardiac contraction	1448553_at	Myh7	myosin, heavy polypeptide 7, cardiac muscle, beta	5.75602	1.61014	5.09948	1.08525	0.634398	3	20.8952
Mouse	Cardiac contraction	1448394_at	Myl2	myosin, light polypeptide 2, regulatory, cardiac, slow	10.7934	0.458855	10.8899	0.405821	1.06921	35	76.106
Mouse	Cardiac contraction	1427768_s_at	Myl3	myosin, light polypeptide 3	11.0937	0.445744	11.1036	0.368419	1.00693	37	77.2327
Mouse	Cardiac contraction	1425506_at	Mylk	myosin, light polypeptide kinase	4.4979	0.519892	4.72815	0.456024	1.17304	17	54.6636
Mouse	Cardiac contraction	1427556_at	Mylk2	myosin, light polypeptide kinase 2, skeletal muscle	-0.38901	0.870123	-1.05822	0.736374	0.628851	0	2.58469
Mouse	Cardiac contraction	1439101_at	Mylk3	myosin light chain kinase 3	7.35632	0.528572	7.60167	0.426352	1.18538	17	50.5442
Mouse	Cardiac contraction	1441111_at	Mylk4	myosin light chain kinase family, member 4	5.69693	0.679582	5.0568	0.658399	0.641654	0	0.355745
Mouse	Cardiac contraction	1458626_at	Nos1	Nitric oxide synthase 1, neuronal	-0.919033	0.494113	-0.818318	0.615137	1.0723	36	77.1485
Mouse	Cardiac contraction	1422622_at	Nos3	nitric oxide synthase 3, endothelial cell	3.82602	0.402473	3.97919	0.345126	1.11202	28	64.9127
Mouse	Cardiac contraction	1424990_at	Orai1	ORAI calcium release-activated calcium modulator 1	2.02917	0.844598	2.05214	0.594023	1.01604	37	77.6239
Mouse	Cardiac contraction	1434762_at	Orai2	ORAI calcium release-activated calcium modulator 2	-0.708647	0.56272	-0.455855	0.714834	1.19151	24	59.5052
Mouse	Cardiac contraction	1434064_at	Orai3	ORAI calcium release-activated calcium modulator 3	2.06776	0.771214	2.52596	0.489979	1.37383	1	22.558
Mouse	Cardiac contraction	1449298_a_at	Pde1a	phosphodiesterase 1A, calmodulin-dependent	0.735104	0.665557	1.42954	0.50332	1.61825	0	0
Mouse	Cardiac contraction	1449420_at	Pde1b	phosphodiesterase 1B, Ca2+-calmodulin dependent	-0.0192224	0.63238	0.215796	0.814489	1.17692	28	65.8199
Mouse	Cardiac contraction	1440374_at	Pde1c	phosphodiesterase 1C	4.3132	0.574539	4.08011	0.526795	0.850809	10	36.8735
Mouse	Cardiac contraction	1422743_at	Phka1	phosphorylase kinase alpha 1	3.89421	0.594158	5.09151	0.645741	2.2931	0	0
Mouse	Cardiac contraction	1434518_at	Phka2	phosphorylase kinase alpha 2	3.42825	0.376871	3.38106	0.351039	0.96782	27	69.1491
Mouse	Cardiac contraction	1434511_at	Phkb	phosphorylase kinase beta	5.25259	0.515629	4.84456	0.399979	0.75365	0	5.7646
Mouse	Cardiac contraction	1422315_x_at	Phkg1	phosphorylase kinase gamma 1	3.37719	0.51137	3.96596	0.639271	1.50397	0	4.07707
Mouse	Cardiac contraction	1428511_at	Phkg2	phosphorylase kinase, gamma 2 (testis)	2.42586	0.493456	2.38975	0.570241	0.975284	27	72.5701
Mouse	Cardiac contraction	1435043_at	Plcb1	phospholipase C, beta 1	1.97636	0.434368	2.31437	0.409156	1.26401	1	24.1668
Mouse	Cardiac contraction	1452481_at	Plcb2	phospholipase C, beta 2	0.457293	0.550195	0.816026	0.623367	1.2823	3	35.5806
Mouse	Cardiac contraction	1448661_at	Plcb3	phospholipase C, beta 3	1.90566	0.55881	2.09042	0.635502	1.13663	30	68.6761
Mouse	Cardiac contraction	1435771_at	Plcb4	phospholipase C, beta 4	5.69502	0.533775	5.7959	0.386149	1.07243	35	76.1037
Mouse	Cardiac contraction	1416675_s_at	Plcd1	phospholipase C, delta 1	3.29948	0.605789	3.26213	0.268149	0.974445	27	71.8989
Mouse	Cardiac contraction	1431892_a_at	Plcd3	phospholipase C, delta 3	2.11606	0.626048	1.98052	0.472852	0.910331	17	56.139
Mouse	Cardiac contraction	1452398_at	Plce1	phospholipase C, epsilon 1	3.87723	0.391351	3.95929	0.332031	1.05853	36	76.5851
Mouse	Cardiac contraction	1435149_at	Plcg1	phospholipase C, gamma 1	3.68238	0.63607	3.5718	0.451378	0.926215	24	60.7656
Mouse	Cardiac contraction	1426926_at	Plcg2	phospholipase C, gamma 2	2.22879	0.425813	2.60369	0.34481	1.29675	0	13.671
Mouse	Cardiac contraction	1432405_a_at	Plcz1	phospholipase C, zeta 1	-1.27689	0.536269	-1.32648	0.553148	0.966211	27	70.8337
Mouse	Cardiac contraction	1460332_at	Pln	phospholamban	10.4096	0.445531	10.4557	0.443153	1.03247	37	78.6041
Mouse	Cardiac contraction	1426401_at	Ppp3ca	protein phosphatase 3, catalytic subunit, alpha isoform	4.75452	0.366012	4.71122	0.235472	0.970429	27	69.0109
Mouse	Cardiac contraction	1428473_at	Ppp3cb	protein phosphatase 3, catalytic subunit, beta isoform	5.90717	0.440037	5.83413	0.446199	0.950636	27	65.5046
Mouse	Cardiac contraction	1420743_a_at	Ppp3cc	protein phosphatase 3, catalytic subunit, gamma isoform	3.41926	0.745086	3.30186	0.309762	0.921853	24	59.8655
Mouse	Cardiac contraction	1433591_at	Ppp3r1	protein phosphatase 3, regulatory subunit B, alpha isoform (calcineurin B, type I)	4.93265	0.737752	5.20722	0.35294	1.20963	17	50.8881
Mouse	Cardiac contraction	1447720_x_at	Prkaca	protein kinase, cAMP dependent, catalytic, alpha	6.85137	0.596929	6.76079	0.517646	0.939148	24	64.5557
Mouse	Cardiac contraction	1420611_at	Prkacb	protein kinase, cAMP dependent, catalytic, beta	5.05197	0.422118	5.1123	0.323877	1.04271	37	78.2427
Mouse	Cardiac contraction	1450945_at	Prkca	protein kinase C, alpha	3.46188	0.518472	3.2612	0.358843	0.870141	10	37.0955
Mouse	Cardiac contraction	1460419_a_at	Prkcb	protein kinase C, beta	0.947996	0.572729	0.995676	0.960903	1.0336	37	78.3377
Mouse	Cardiac contraction	1455758_at	Prkcc	protein kinase C, gamma	-1.07362	0.798597	-1.44909	0.896573	0.770853	6	29.591
Mouse	Cardiac contraction	1424286_at	Prkx	protein kinase, X-linked	3.47389	0.382757	3.48956	0.334844	1.01092	37	77.7145
Mouse	Cardiac contraction	1434653_at	Ptk2b	PTK2 protein tyrosine kinase 2 beta	0.908042	0.494017	1.54753	0.667595	1.55777	0	1.41813
Mouse	Cardiac contraction	1457347_at	Ryr1	ryanodine receptor 1, skeletal muscle	-1.09761	0.50999	-1.34028	0.570996	0.84518	10	34.6551
Mouse	Cardiac contraction	1450123_at	Ryr2	ryanodine receptor 2, cardiac	9.29571	0.56746	9.61401	0.456166	1.24687	3	37.1431
Mouse	Cardiac contraction	1427427_at	Ryr3	ryanodine receptor 3	0.966523	0.883656	0.544501	1.13243	0.746378	6	30.8631
Mouse	Cardiac contraction	1424562_a_at	Slc25a4	solute carrier family 25 (mitochondrial carrier, adenine nucleotide translocator), member 4	11.1479	0.387555	11.3114	0.334573	1.12	27	61.7021
Mouse	Cardiac contraction	1436874_x_at	Slc25a5	solute carrier family 25 (mitochondrial carrier, adenine nucleotide translocator), member 5	8.38642	0.434297	8.70582	0.35658	1.24781	1	25.3802
Mouse	Cardiac contraction	1437675_at	Slc8a1	solute carrier family 8 (sodium/calcium exchanger), member 1	2.92968	1.32765	3.20969	0.868425	1.2142	30	70.0718
Mouse	Cardiac contraction	1438262_at	Slc8a2	solute carrier family 8 (sodium/calcium exchanger), member 2	-1.15398	0.533706	-1.32461	0.638052	0.888452	17	50.8042
Mouse	Cardiac contraction	1440962_at	Slc8a3	solute carrier family 8 (sodium/calcium exchanger), member 3	-0.771857	0.674511	-0.994425	0.671983	0.857039	10	44.7109
Mouse	Cardiac contraction	1417397_at	Slc9a1	solute carrier family 9 (sodium/hydrogen exchanger), member 1	2.84322	0.423596	3.11779	0.490417	1.20963	6	42.2253
Mouse	Cardiac contraction	1435008_at	Slc9a6	solute carrier family 9 (sodium/hydrogen exchanger), member 6	4.15006	0.576507	4.33151	0.446049	1.13403	28	65.9617
Mouse	Cardiac contraction	1436945_x_at	Stim1	stromal interaction molecule 1	1.70147	0.803285	2.20971	0.417812	1.42232	0	15.0628
Mouse	Cardiac contraction	1434219_at	Stim2	stromal interaction molecule 2	3.03592	0.454898	3.38127	0.341356	1.27046	1	20.4172
Mouse	Cardiac contraction	1418370_at	Tnnc1	troponin C, cardiac/slow skeletal	9.91026	0.593663	9.84795	0.442242	0.957729	27	68.6561
Mouse	Cardiac contraction	1422536_at	Tnni3	troponin I, cardiac 3	10.4239	0.465101	10.5402	0.386766	1.08399	32	73.6447
Mouse	Cardiac contraction	1424967_x_at	Tnnt2	troponin T2, cardiac	11.0866	0.423662	11.2622	0.385255	1.12948	27	61.5603
Mouse	Cardiac contraction	1423049_a_at	Tpm1	tropomyosin 1, alpha	10.4623	0.483138	10.4747	0.393228	1.00865	37	77.3739
Mouse	Cardiac contraction	1419738_a_at	Tpm2	tropomyosin 2, beta	5.16955	0.426011	5.0046	0.444211	0.891961	10	44.809
Mouse	Cardiac contraction	1427260_a_at	Tpm3	tropomyosin 3, gamma	5.32638	0.422792	5.77309	0.412953	1.36293	0	6.65512
Mouse	Cardiac contraction	1433883_at	Tpm4	tropomyosin 4	6.18692	0.496789	6.74692	0.346765	1.47427	0	0
