# Supplementary material for: Robust coordination of cardiac functions from gene co-expression reveals a versatile combinatorial transcriptional control
Source: Royal Society of Chemistry journal article supplement (doi:10.1039/c4mb00024b), 2014-05-28
Supplement: c4mb00024b3.xlsx [file c4mb00024b3.xlsx]

## Sheet: Coordination properties
Supplementary Table 2: Coordination of genes with the functional gene sets in rat and mice left ventricle samples.
Group	Functional gene set		Number of correlations with the gene set								Coordinated genes external to the gene set
			maximum					threshold
		# Probe sets	number		number / ID			p<0.05 vs random			number		ratio	common genes
Rats			CTR	LVH	CTR	LVH		CTR	LVH		CTR	LVH	LVH / CTR	LVH & CTR
														number	ratio vs mean
	Coordination
	Energy production	217	19	37	0.0875576	0.170507		3	5		271	338	1.24723	86	0.28243
	Cardiac contraction	120	20	10	0.166667	0.0833333		2	2		319	620	1.94357	82	0.174654
	Inverse coordination
	Energy production	217	13	42	0.0599078	0.193548		3	5		285	419	1.47018	95	0.269886
	Cardiac contraction	120	9	6	0.075	0.05		2	2		120	403	3.35833	11	0.042065
Mice			Ctrl	Isop	Ctrl	Isop		Ctrl	Isop		Ctrl	Isop	Isop / Ctrl	Isop & Ctrl
														number	ratio vs mean
	Coordination
	Energy production	212	135	139	0.636792	0.65566		36	31		2695	2049	0.760297	1237	0.521501
	Cardiac contraction	123	33	27	0.268293	0.219512		23	21		321	67	0.208723	37	0.190722
	Inverse coordination
	Energy production	212	76	90	0.358491	0.424528		6	4		233	129	0.553648	7	0.038674
	Cardiac contraction	123	24	14	0.195122	0.113821		5	3		249	89	0.35743	6	0.035503
CTR: control rats; LVH: rats with left ventricular hypertrophy; Ctrl: control mice; Isop: mice treated with isoprenaline
