# Supplementary material for: Robust coordination of cardiac functions from gene co-expression reveals a versatile combinatorial transcriptional control
Source: Royal Society of Chemistry journal article supplement (doi:10.1039/c4mb00024b), 2014-05-28
Supplement: c4mb00024b4.xlsx [file c4mb00024b4.xlsx]

## Sheet: GO terms
Supplementary Table 3: Enriched GO terms annotating genes coordinated (Coord) or inversely coordinated (InvCoord) with energy production
and cardiac contraction functions.
Families of GO terms:
energy metabolism			muscle process			protein process		development		immune process		other
Species	Type	Function	Group	Nb genes	Nb distinct genes per term family	GO.ID	Term	Annotated	Significant	Expected	defaultFisher p-value	defaultFisher_adjustBH p_value
Rat	Coord	CC	CTR	319	12	GO:0015986	ATP synthesis coupled proton transport	16	6	0.37	9.9e-07	0.00099
						GO:0006099	tricarboxylic acid cycle	30	6	0.7	5.6e-05	0.028
Rat	Coord	CC	LVH	620	45	GO:0042744	hydrogen peroxide catabolic process	25	8	1.09	7.1e-06	0.00355
						GO:0006099	tricarboxylic acid cycle	30	8	1.31	3.2e-05	0.0106667
						GO:0022900	electron transport chain	89	16	3.9	5.5e-05	0.01375
						GO:0006101	citrate metabolic process	10	4	0.44	0.00062	0.0447619
						GO:0006107	oxaloacetate metabolic process	17	5	0.74	0.00063	0.0447619
						GO:0006166	purine ribonucleoside salvage	5	3	0.22	0.00078	0.0447619
						GO:0006635	fatty acid beta-oxidation	63	9	2.76	0.00081	0.0447619
					31	GO:0030199	collagen fibril organization	48	11	2.1	5.2e-06	0.00355
						GO:0032964	collagen biosynthetic process	36	5	1.58	0.00022	0.0244444
						GO:0035994	response to muscle stretch	5	3	0.22	0.00078	0.0447619
						GO:0071873	response to norepinephrine stimulus	5	3	0.22	0.00078	0.0447619
						GO:0001501	skeletal system development	333	23	14.58	0.00085	0.0447619
					35	GO:0006412	translation	388	31	16.99	0.00021	0.0244444
						GO:0070208	protein heterotrimerization	11	4	0.48	0.00094	0.0447619
					20	GO:0048845	venous blood vessel morphogenesis	7	4	0.31	0.00011	0.0183333
						GO:0097084	vascular smooth muscle cell development	7	4	0.31	0.00011	0.0183333
						GO:0035148	tube formation	114	9	4.99	0.00093	0.0447619
						GO:0031571	mitotic G1 DNA damage checkpoint	29	5	1.27	0.00093	0.0447619
						GO:0043589	skin morphogenesis	52	6	2.28	0.00093	0.0447619
						GO:0071560	cellular response to transforming growth...	160	18	7	0.00029	0.029
						GO:0071230	cellular response to amino acid stimulus	48	9	2.1	0.0002	0.0244444
Rat	Coord	EnProd	CTR	271	24	GO:0032780	negative regulation of ATPase activity	9	5	0.19	4.2e-07	6e-05
						GO:0006200	ATP catabolic process	116	11	2.39	2.6e-05	0.00216667
						GO:0043462	regulation of ATPase activity	41	13	0.84	2.9e-05	0.00223077
						GO:0009083	branched-chain amino acid catabolic proc...	13	4	0.27	0.00011	0.00611111
						GO:0032781	positive regulation of ATPase activity	24	5	0.49	0.00011	0.00611111
					32	GO:0060048	cardiac muscle contraction	115	22	2.37	2.3e-14	2.3e-11
						GO:0055010	ventricular cardiac muscle tissue morpho...	69	13	1.42	1.2e-09	6e-07
						GO:0002026	regulation of the force of heart contrac...	38	10	0.78	3.2e-09	1.06667e-06
						GO:0045214	sarcomere organization	41	10	0.84	7.2e-09	1.8e-06
						GO:0048739	cardiac muscle fiber development	10	6	0.21	1.4e-08	2.8e-06
						GO:0055003	cardiac myofibril assembly	15	6	0.31	3.1e-07	5.16667e-05
						GO:0055008	cardiac muscle tissue morphogenesis	87	19	1.79	5.3e-07	6.625e-05
						GO:0030240	skeletal muscle thin filament assembly	6	4	0.12	2.5e-06	0.00025
						GO:0055009	atrial cardiac muscle tissue morphogenes...	6	4	0.12	2.5e-06	0.00025
						GO:0002027	regulation of heart rate	88	12	1.81	4.2e-06	0.000381818
						GO:0007512	adult heart development	20	5	0.41	4.3e-05	0.00307143
						GO:1902305	regulation of sodium ion transmembrane t...	28	6	0.58	8.1e-05	0.00525
						GO:0035994	response to muscle stretch	5	3	0.1	8.4e-05	0.00525
						GO:0030049	muscle filament sliding	11	5	0.23	0.00016	0.00842105
						GO:0031034	myosin filament assembly	8	3	0.16	0.00045	0.0225
						GO:0060307	regulation of ventricular cardiac muscle...	20	4	0.41	0.00065	0.0309524
						GO:0010881	regulation of cardiac muscle contraction...	10	3	0.21	0.00093	0.0408696
						GO:0006941	striated muscle contraction	152	26	3.13	0.00094	0.0408696
						GO:0033275	actin-myosin filament sliding	14	7	0.29	0.00119	0.0495833
Rat	Coord	EnProd	LVH	338	33	GO:0009083	branched-chain amino acid catabolic proc...	13	8	0.32	1.3e-10	1.3e-07
						GO:0006573	valine metabolic process	9	5	0.22	9.5e-07	0.000158333
						GO:0006200	ATP catabolic process	116	13	2.82	4.6e-06	0.000657143
						GO:0006166	purine ribonucleoside salvage	5	3	0.12	0.00014	0.0107143
						GO:0006551	leucine metabolic process	5	3	0.12	0.00014	0.0107143
						GO:1901606	alpha-amino acid catabolic process	76	11	1.85	0.00026	0.0158824
						GO:0006538	glutamate catabolic process	6	3	0.15	0.00027	0.0158824
						GO:0009145	purine nucleoside triphosphate biosynthe...	51	5	1.24	0.00058	0.0273913
						GO:0006103	2-oxoglutarate metabolic process	17	4	0.41	0.00063	0.0273913
					35	GO:0002026	regulation of the force of heart contrac...	38	11	0.92	1.2e-09	6e-07
						GO:0060048	cardiac muscle contraction	115	19	2.8	1.8e-09	6e-07
						GO:0045214	sarcomere organization	41	11	1	2.4e-09	6e-07
						GO:0055003	cardiac myofibril assembly	15	6	0.36	8.1e-07	0.000158333
						GO:0055010	ventricular cardiac muscle tissue morpho...	69	9	1.68	4.1e-05	0.005125
						GO:0048739	cardiac muscle fiber development	10	4	0.24	6.4e-05	0.00711111
						GO:0048747	muscle fiber development	138	11	3.36	0.00014	0.0107143
						GO:0055009	atrial cardiac muscle tissue morphogenes...	6	3	0.15	0.00027	0.0158824
						GO:0070296	sarcoplasmic reticulum calcium ion trans...	37	8	0.9	0.00044	0.0231579
						GO:0045822	negative regulation of heart contraction	29	5	0.71	0.0006	0.0273913
						GO:0002027	regulation of heart rate	88	9	2.14	0.00061	0.0273913
						GO:0007512	adult heart development	20	4	0.49	0.00122	0.0488
					6	GO:0050873	brown fat cell differentiation	31	6	0.75	8.6e-05	0.0086
						GO:0010044	response to aluminum ion	12	4	0.29	0.00015	0.0107143
						GO:0032869	cellular response to insulin stimulus	184	10	4.48	0.00043	0.0231579
						GO:0071313	cellular response to caffeine	8	3	0.19	0.00073	0.0304167
Rat	InvCoord	CC	CTR	120	0
Rat	InvCoord	CC	LVH	403	43	GO:0009083	branched-chain amino acid catabolic proc...	13	6	0.38	8.4e-07	0.0008
						GO:0006099	tricarboxylic acid cycle	30	8	0.87	1.6e-06	0.0008
						GO:0006635	fatty acid beta-oxidation	63	12	1.83	6.1e-05	0.0203333
						GO:0006107	oxaloacetate metabolic process	17	5	0.5	9.4e-05	0.0235
						GO:0006166	purine ribonucleoside salvage	5	3	0.15	0.00023	0.0383333
						GO:0044262	cellular carbohydrate metabolic process	243	20	7.08	0.00036	0.045
					6	GO:0050873	brown fat cell differentiation	31	6	0.9	0.00023	0.0383333
					6	GO:0034341	response to interferon-gamma	72	6	2.1	0.00036	0.045
Rat	InvCoord	EnProd	CTR	285	3	GO:0001798	positive regulation of type IIa hypersen...	5	3	0.1	8e-05	0.04
						GO:0001812	positive regulation of type I hypersensi...	5	3	0.1	8e-05	0.04
Rat	InvCoord	EnProd	LVH	419	43	GO:0030199	collagen fibril organization	48	11	1.45	1.4e-07	0.00014
						GO:0007519	skeletal muscle tissue development	255	16	7.72	6.3e-06	0.0021
						GO:0032964	collagen biosynthetic process	36	7	1.09	5.1e-05	0.0102
						GO:0001501	skeletal system development	333	22	10.08	6.4e-05	0.0102857
						GO:0043206	extracellular fibril organization	11	4	0.33	0.00023	0.0176923
						GO:0070278	extracellular matrix constituent secreti...	6	3	0.18	0.00051	0.0255
						GO:1900116	extracellular negative regulation of sig...	7	3	0.21	0.00088	0.0379167
					12	GO:0070208	protein heterotrimerization	11	4	0.33	0.00023	0.0176923
						GO:0045185	maintenance of protein location	92	8	2.78	0.0005	0.0255
					47	GO:0001525	angiogenesis	363	31	10.99	0.00011	0.012
						GO:0043589	skin morphogenesis	52	7	1.57	0.00022	0.0176923
						GO:0001974	blood vessel remodeling	43	7	1.3	0.00027	0.0192857
						GO:0001568	blood vessel development	531	41	16.07	0.00034	0.02125
						GO:0010718	positive regulation of epithelial to mes...	35	6	1.06	0.00057	0.0271429
					40	GO:0019886	antigen processing and presentation of e...	13	5	0.39	2.6e-05	0.0065
						GO:0046718	viral entry into host cell	10	4	0.3	0.00011	0.012
						GO:0042060	wound healing	338	27	10.23	0.00012	0.012
						GO:0034341	response to interferon-gamma	72	8	2.18	0.00042	0.0247059
						GO:0002283	neutrophil activation involved in immune...	12	3	0.36	0.00091	0.0379167
						GO:0071230	cellular response to amino acid stimulus	48	10	1.45	1.3e-06	0.00065
						GO:0007229	integrin-mediated signaling pathway	60	9	1.82	7.2e-05	0.0102857
						GO:0031960	response to corticosteroid stimulus	290	19	8.78	0.00031	0.0206667
						GO:0010288	response to lead ion	34	6	1.03	0.00048	0.0255
						GO:0071260	cellular response to mechanical stimulus	82	9	2.48	0.0008	0.0363636
Mouse	Coord	CC	Ctrl	321	56	GO:0022900	electron transport chain	244	25	2.15	1.5e-13	7.5e-11
						GO:0015986	ATP synthesis coupled proton transport	24	8	0.21	2.2e-11	7.33333e-09
						GO:0006099	tricarboxylic acid cycle	61	9	0.54	3.3e-09	7.2e-07
						GO:0006096	glycolysis	129	11	1.14	2.2e-08	3.66667e-06
						GO:0006172	ADP biosynthetic process	13	4	0.11	4e-06	0.0005
						GO:0033539	fatty acid beta-oxidation using acyl-CoA...	9	3	0.08	5.5e-05	0.00611111
						GO:0006200	ATP catabolic process	238	9	2.1	0.00028	0.0254545
						GO:0006120	mitochondrial electron transport, NADH t...	15	3	0.13	0.00028	0.0254545
						GO:0006086	acetyl-CoA biosynthetic process from pyr...	17	3	0.15	0.00042	0.035
					40	GO:0006412	translation	1032	31	9.09	3.6e-09	7.2e-07
						GO:0051289	protein homotetramerization	128	9	1.13	2.2e-06	0.000314286
Mouse	Coord	CC	Isop	67	25	GO:0022900	electron transport chain	244	14	0.44	2.7e-13	2.7e-10
						GO:0006099	tricarboxylic acid cycle	61	6	0.11	1.3e-09	4.33333e-07
						GO:0006532	aspartate biosynthetic process	5	2	0.01	3.1e-05	0.00516667
						GO:0019550	glutamate catabolic process to aspartate	5	2	0.01	3.1e-05	0.00516667
						GO:0019551	glutamate catabolic process to 2-oxoglut...	5	2	0.01	3.1e-05	0.00516667
						GO:0006096	glycolysis	129	4	0.23	8.7e-05	0.0124286
						GO:0006533	aspartate catabolic process	9	2	0.02	0.00011	0.01375
						GO:0032364	oxygen homeostasis	13	2	0.02	0.00024	0.0266667
						GO:0006102	isocitrate metabolic process	15	2	0.03	0.00033	0.033
						GO:0006086	acetyl-CoA biosynthetic process from pyr...	17	2	0.03	0.00042	0.0381818
Mouse	Coord	EnProd	Ctrl	2695	8	GO:0016226	iron-sulfur cluster assembly	22	8	1.64	0.00012	0.024
					25	GO:0060048	cardiac muscle contraction	177	25	13.19	0.00012	0.024
					536	GO:0006412	translation	1032	192	76.92	2.5e-26	2.5e-23
						GO:0015031	protein transport	2565	253	191.19	1.1e-05	0.0055
						GO:0042254	ribosome biogenesis	342	61	25.49	5.1e-05	0.017
						GO:0006364	rRNA processing	224	33	16.7	0.00025	0.04
						GO:0016192	vesicle-mediated transport	1859	153	138.56	0.00029	0.04
						GO:0042273	ribosomal large subunit biogenesis	32	10	2.39	0.00032	0.04
						GO:0090230	regulation of centromere complex assembl...	11	5	0.82	0.00041	0.0455556
Mouse	Coord	EnProd	Isop	2049	134	GO:0006744	ubiquinone biosynthetic process	16	8	0.91	8.9e-07	0.0004995
						GO:0016226	iron-sulfur cluster assembly	22	9	1.25	1.5e-06	0.0004995
						GO:0070129	regulation of mitochondrial translation	11	6	0.62	1.2e-05	0.00171257
						GO:0032981	mitochondrial respiratory chain complex ...	29	9	1.64	2.1e-05	0.002442
						GO:0006390	transcription from mitochondrial promote...	12	6	0.68	2.2e-05	0.002442
						GO:0033617	mitochondrial respiratory chain complex ...	5	4	0.28	4.9e-05	0.00407285
						GO:0006749	glutathione metabolic process	73	14	4.13	6e-05	0.00428143
						GO:0045454	cell redox homeostasis	115	18	6.51	8.2e-05	0.0054612
						GO:0042744	hydrogen peroxide catabolic process	28	8	1.59	0.00012	0.00630947
						GO:0006626	protein targeting to mitochondrion	71	14	4.02	0.00013	0.0064935
						GO:0007005	mitochondrion organization	593	87	33.58	0.00018	0.00856286
						GO:0070584	mitochondrion morphogenesis	43	9	2.43	0.00057	0.0247578
					41	GO:0060048	cardiac muscle contraction	177	23	10.02	6e-06	0.0011988
						GO:0045214	sarcomere organization	64	14	3.62	1.1e-05	0.00171257
						GO:0055010	ventricular cardiac muscle tissue morpho...	95	16	5.38	5.1e-05	0.00407285
						GO:0055003	cardiac myofibril assembly	31	8	1.76	0.00011	0.006105
						GO:0030049	muscle filament sliding	14	6	0.79	0.00102	0.0391915
					417	GO:0006412	translation	1032	161	58.44	< 1e-30	NA
						GO:0006888	ER to Golgi vesicle-mediated transport	93	21	5.27	1.3e-06	0.0004995
						GO:0030433	ER-associated protein catabolic process	66	15	3.74	3.2e-06	0.0007992
						GO:0042273	ribosomal large subunit biogenesis	32	9	1.81	4.7e-05	0.00407285
						GO:0006886	intracellular protein transport	1385	121	78.42	5.3e-05	0.00407285
						GO:0000028	ribosomal small subunit assembly	27	8	1.53	8.8e-05	0.0054945
						GO:0006891	intra-Golgi vesicle-mediated transport	40	7	2.26	0.00011	0.006105
						GO:0016192	vesicle-mediated transport	1859	133	105.26	0.00044	0.01998
						GO:0010890	positive regulation of sequestering of t...	8	4	0.45	0.0006	0.024975
						GO:0051604	protein maturation	230	26	13.02	0.00074	0.0295704
						GO:0006364	rRNA processing	224	27	12.68	0.00108	0.03996
Mouse	InvCoord	CC	Ctrl	249	0
Mouse	InvCoord	CC	Isop	89	0
Mouse	InvCoord	EnProd	Ctrl	233	0
Mouse	InvCoord	EnProd	Isop	129	3	GO:0048268	clathrin coat assembly	33	3	0.07	4e-05	0.021
					4	GO:0048538	thymus development	96	4	0.19	4.2e-05	0.021
