# Supplementary material for: Robust coordination of cardiac functions from gene co-expression reveals a versatile combinatorial transcriptional control
Source: Royal Society of Chemistry journal article supplement (doi:10.1039/c4mb00024b), 2014-05-28
Supplement: c4mb00024b5.pdf [file c4mb00024b5.pdf]

**Supplementary table 4:** Enrichment of targets of transcription factors in the gene sets of energy and production (EnProd) and cardiac contraction (CC).

The targets have been detected by the ChIP experiments included in the ChEA database.

Green background: significant factors obtained in mouse experiments.

| Transcriptional regulators |               |                | ChEA: enrichment of targets |          |          | ChEA2: enrichment of targets |         |                |          |         |                |
|----------------------------|---------------|----------------|-----------------------------|----------|----------|------------------------------|---------|----------------|----------|---------|----------------|
| Gene symbol                | Identified in | Genomatix type | Species                     | EnProd   | CC       | EnProd                       |         | Combined Score | CC       |         | Combined Score |
|                            |               |                |                             | p-Value  | p-Value  | P-value                      | Z-score |                | P-value  | Z-score |                |
| Crx                        | Ctrl mice     | TF             | Mouse                       | 9.03E-04 | 0.0062   | 0.0022                       | -0.385  | 2.359          | 0.0107   | -0.1177 | 0.534          |
| Cttnb1                     | Ctrl mice     | CoF            | Human                       | 8.05E-04 | 9.56E-05 | 0.0023                       | -0.181  | 1.102          | 2.54E-04 | -0.6957 | 5.758          |
| Eomes                      | Ctrl mice     | TF             | Human                       | 1.52E-07 | 5.55E-05 | 8.81E-07                     | -1.025  | 14.285         | 1.50E-04 | -0.8545 | 7.523          |
| Eomes                      | Ctrl mice     | TF             | Mouse                       | 1.85E-05 | 0.0256   | 1.07E-04                     | -0.519  | 4.740          | 0.0490   | 0.6265  | -1.889         |
| Sin3b                      | Ctrl mice     | CoF            | Mouse                       | 1.16E-09 | 2.34E-08 | 5.61E-08                     | 0.405   | -6.754         | 3.47E-07 | 0.1022  | -1.520         |
| Tfap2a                     | Ctrl mice     | TF             | Human                       | 0.0056   | 5.43E-08 | 0.0170                       | 0.515   | -2.099         | 3.55E-07 | -0.9970 | 14.807         |
| Myb                        | Isop mice     | TF             | Mouse                       | 0.0013   | 0.0032   | 0.0034                       | -0.158  | 0.897          | 0.0063   | -0.1239 | 0.628          |
| Tcf7                       | Isop mice     | TF             | Mouse                       | 0.0070   | 9.84E-10 |                              |         |                |          |         |                |
| Irf1                       | CTR rats      | TF             | Human                       | 0.0205   | ns       | 0.0295                       | -0.306  | 1.078          | ns       |         |                |
| Stat1                      | CTR rats      | TF             | Human                       | 0.0230   | ns       | 0.0407                       | 0.207   | -0.664         | ns       |         |                |
| Ccnd1                      | LVH rats      | CoF            | Mouse                       | 9.24E-15 | ns       | 4.45E-13                     | -1.512  | 42.996         | ns       |         |                |
| Wt1                        | LVH rats      | TF             | Human                       | ns       | 0.0042   | ns                           |         |                | 0.0061   | -0.65   | 3.327          |
| Wt1                        | LVH rats      | TF             | Mouse                       | ns       | 3.03E-11 | ns                           |         |                | 2.95E-10 | -1.40   | 30.800         |

The targets come from experiments that were part of the ENCODE project. Green background: significant factors.

| Transcriptional regulators |               |                | ENCODE TF CHIP-seq: enrichment of targets |          |         |                |         |         |                |
|----------------------------|---------------|----------------|-------------------------------------------|----------|---------|----------------|---------|---------|----------------|
| Gene symbol                | Identified in | Genomatix type | Cell type (human)                         | EnProd   |         |                | CC      |         |                |
|                            |               |                |                                           | P-value  | Z-score | Combined Score | P-value | Z-score | Combined Score |
| RUNX3                      | Ctrl mice     | TF             | GM12878                                   | ns       |         |                | ns      | -0.1990 | 0.0309         |
| IRF1                       | CTR rats      | TF             | K562                                      | 0.0150   | -0.3838 | 1.6110         | ns      | -0.8762 | 0.4154         |
| STAT1                      | CTR rats      | TF             | GM12878                                   | 0.0020   | -0.9040 | 5.6027         | ns      | 0.0628  | -0.0086        |
| STAT1                      | CTR rats      | TF             | HELAS3                                    | ns       |         |                | ns      | -0.9499 | 0.3939         |
| E2F6                       | LVH rats      | TF             | H1                                        | ns       |         |                | ns      | 0.0980  | -0.0129        |
| E2F6                       | LVH rats      | TF             | HELAS3                                    | ns       |         |                | ns      | 0.7863  | -0.0187        |
| E2F6                       | LVH rats      | TF             | K562                                      | ns       |         |                |         |         |                |
| ERRA                       | LVH rats      | TF             | HEPG2                                     | 5.02E-07 | -1.5765 | 22.8661        | ns      | -1.4910 | 2.2786         |
